# Supplementary material
Source: PubMed Central journal article supplement (PMC3431017)
Supplement: NIHMS379171-supplement-Supplementary_data.pdf [file NIHMS379171-supplement-Supplementary_data.pdf]

### **Instrumentation and analytical methods.**

$^1\text{H}$  NMR and  $^{13}\text{C}$  NMR spectra were recorded on a Bruker AC-300 spectrometer in deuterated solvents at 300 and 75 MHz, respectively. Chemical shifts are reported in parts per million (ppm,  $\delta$ ) using either tetramethyl silane (TMS) or the solvent residual peak as an internal reference (0.0 ppm). Couplings are reported in hertz.

Electrospray ionization (ESI) MS were obtained using a Shimadzu LCMS-2010 system (Columbia, MD) equipped with two pumps (LC-10ADvp), controller (SCL-10Avp), autoinjector (SIL-10ADvp), UV diode array detector (SPD-M10Avp), and single quadrupole analyzer. GC-MS data were obtained using a Shimadzu GC-17A system (Columbia, MD) equipped with a QP-5000 mass spectrometer. A Restek RTX-5 cross bond 95% polysiloxane column was used for all GC-MS analyses. The standard GC method was as follows: injection temperature 300 °C; initial oven temperature 200 °C; hold 5 min; ramp at 20 °C/min to 300 °C; hold 20 min for a total run time of 30 min. Reversed-phase high performance liquid chromatography (RP-HPLC) was performed using a Shimadzu system equipped with an SCL-10Avp controller, an LC-10AT pump, an FCV-10ALvp solvent mixer, and an SPD-10MAvp UV/vis diode array detector. A Restek Premier C18 column (5  $\mu\text{m}$ , 4.6 mm  $\times$  250 mm) was used for all analytical RP-HPLC work. Standard RP-HPLC conditions were as follows: flow rates were 1 mL/min for analytical separations and 9 mL/min for preparative separations; mobile phase A: water; mobile phase B: acetonitrile. Purities were determined by integration of peaks with UV detection at 220 nm. For AHL **Q13**, the method was 20-95% ACN over 22 min.

FT-IR spectra were recorded with a Bruker Tensor 27 IR spectrometer, outfitted with a single reflection MIRacle Horizontal attenuated total reflectance (ATR) unit from Pike Technologies. A ZnSe crystal with spectral range 20,000 to 650  $\text{cm}^{-1}$  was used for ATR-IR measurements. Optical rotations ( $[\alpha]_{24\text{D}}$ ) were measured on a Perkin-Elmer 241 digital polarimeter at 25 °C.

Microwave ( $\mu\text{W}$ )-assisted solid-phase reactions used in AHL synthesis were performed in either a Milestone MicroSYNTH Labstation or CEM Discover commercial  $\mu\text{W}$  reactor. The Milestone instrument is a multimodal  $\mu\text{W}$  synthesis reactor equipped with a continuous power source (1000 W max).<sup>1</sup> The CEM instrument is a monomodal  $\mu\text{W}$  synthesis reactor equipped with a 300 W (max) power source.<sup>2</sup> All  $\mu\text{W}$ -assisted reactions reported in this study were performed using temperature control to monitor and control  $\mu\text{W}$  irradiation.

**Mass spectroscopy and purity data for Libraries Q, R, and S.**

**Table S-1.** MS and purity data for Libraries Q, R, and S. Controls 1–6, OdDHL, DDHL, and OoHL were synthesized and fully characterized elsewhere.<sup>3-5</sup> Asterisked [\*] peaks indicate the products.

| Compound<br>Expected mol. wt.;<br>Observed mol. wt.<br>[ESI]<br>Purity                     | Structure                                                                           | GC chromatogram                                                                      |
|--------------------------------------------------------------------------------------------|-------------------------------------------------------------------------------------|--------------------------------------------------------------------------------------|
| <p><b>Q1</b><br/>exp [M<sup>+</sup>] = 283;<br/>obs [M+Na<sup>+</sup>] = 306<br/>93.4%</p> | 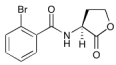   |    |
| <p><b>Q2</b><br/>exp [M<sup>+</sup>] = 283;<br/>obs [M+Na<sup>+</sup>] = 306<br/>93.4%</p> |   |   |
| <p><b>Q3</b><br/>exp [M<sup>+</sup>] = 223;<br/>obs [M+Na<sup>+</sup>] = 246<br/>90.7%</p> |  |  |
| <p><b>Q4</b><br/>exp [M<sup>+</sup>] = 240;<br/>obs [M+Na<sup>+</sup>] = 263<br/>98.1%</p> |  |  |

**Q5**  
exp  $[M^+] = 331$ ;  
obs  $[M+Na^+] = 354$   
98.4%

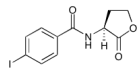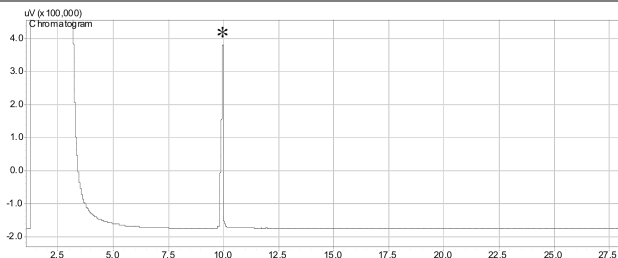

**Q6**  
exp  $[M^+] = 235$ ;  
obs  $[M+Na^+] = 258$   
96.1%

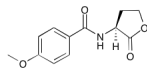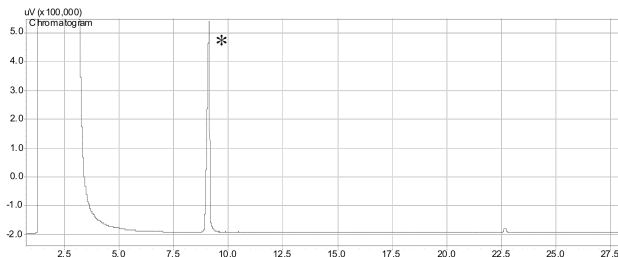

**Q7**  
exp  $[M^+] = 250$ ;  
obs  $[M+Na^+] = 273$   
95.1%

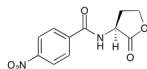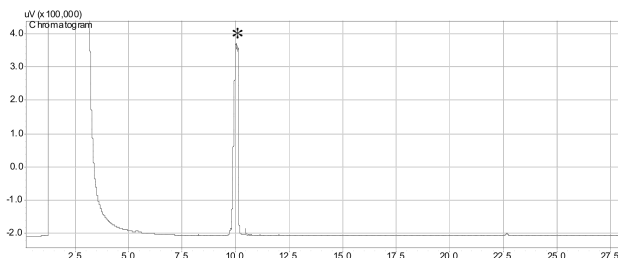

**Q8**  
exp  $[M^+] = 219$ ;  
obs  $[M+Na^+] = 242$   
95.8%

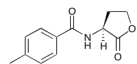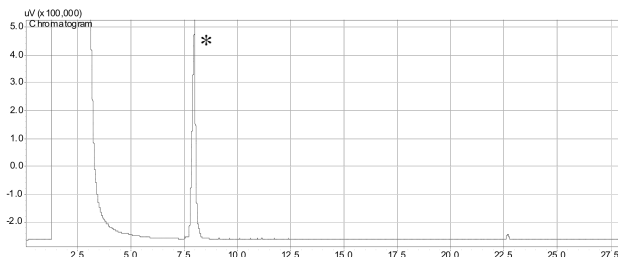

**Q9**  
exp  $[M^+] = 333$ ;  
obs  $[M+H^+] = 334$   
95.6%

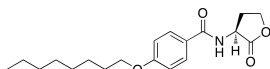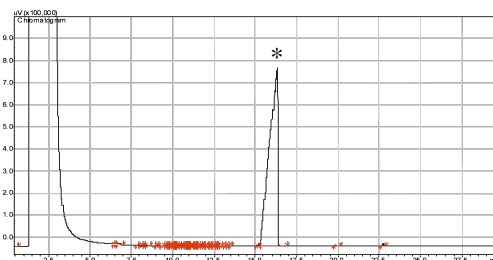

**Q10**  
exp  $[M^+] = 376$ ;  
obs  $[M+Na^+] = 399$   
98.5%

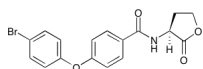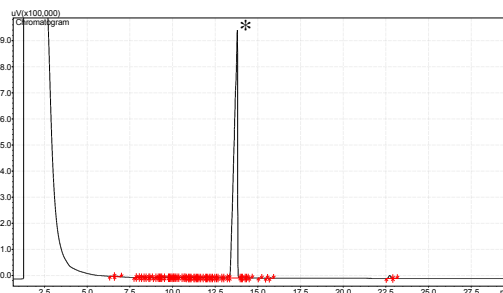

**Q11**  
exp  $[M^+] = 249$ ;  
obs  $[M+Na^+] = 272$   
98.3%

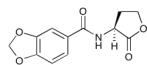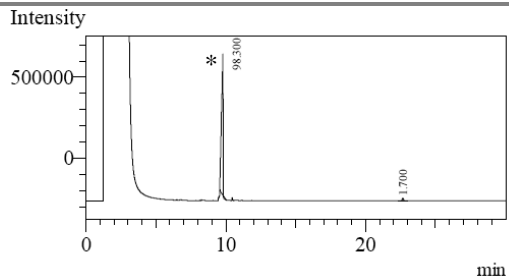

**Q12**  
exp  $[M^+] = 281$ ;  
obs  $[M+Na^+] = 304$   
99.0%

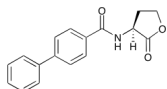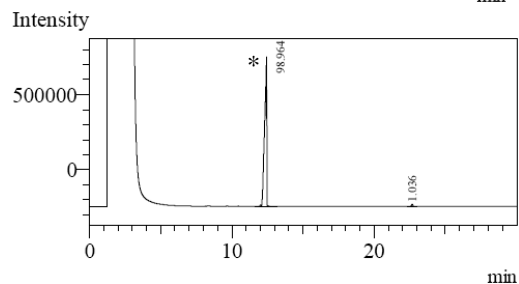

**Q13**  
exp  $[M^+] = 320$ ;  
obs  $[M+Na^+] = 343$   
91.7%

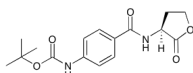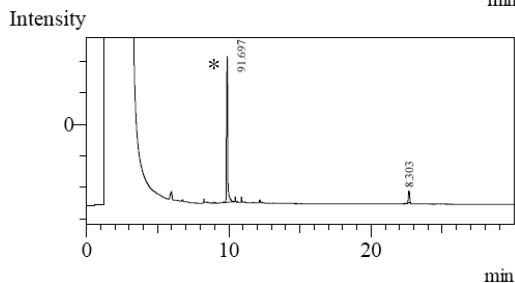

**R1**  
exp  $[M^+] = 249$ ;  
obs  $[M+H^+] = 250$   
99.8%

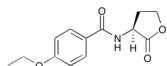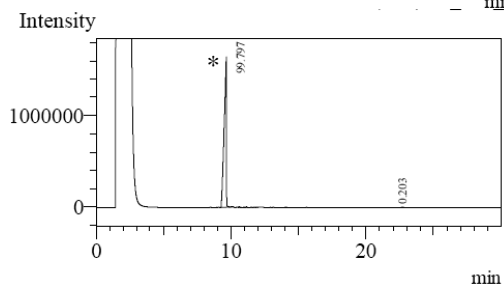

**R2**  
exp  $[M^+] = 263$ ;  
obs  $[M+Na^+] = 286$   
97.8%

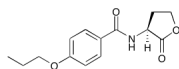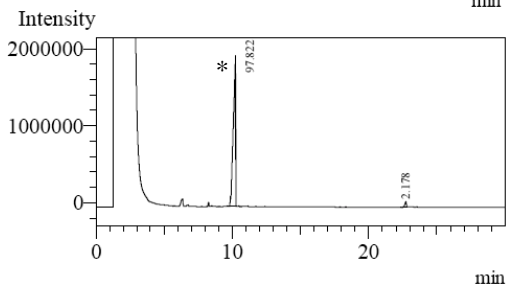

**R3**  
exp  $[M^+] = 263$ ;  
obs  $[M+Na^+] = 286$   
98.5%

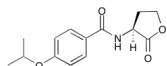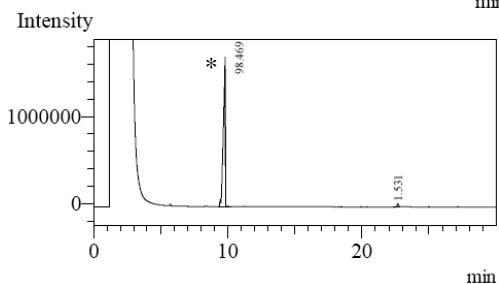

**R4**  
exp [M<sup>+</sup>] = 277;  
obs [M+H<sup>+</sup>] = 278  
99.3%

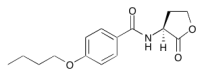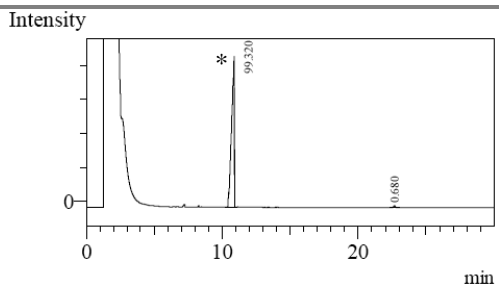

**R5**  
exp [M<sup>+</sup>] = 291;  
obs [M+Na<sup>+</sup>] = 314  
95.5%

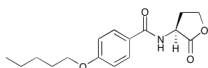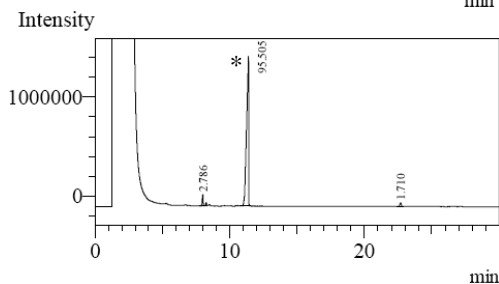

**R6**  
exp [M<sup>+</sup>] = 319;  
obs [M+Na<sup>+</sup>] = 342  
99.7%

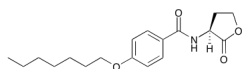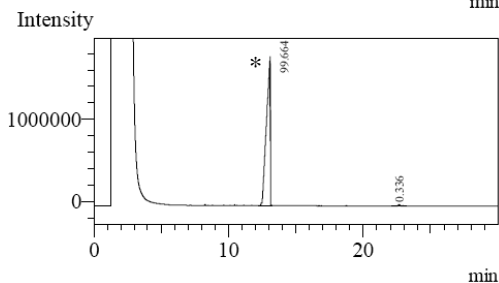

**R7**  
exp [M<sup>+</sup>] = 361;  
obs [M+Na<sup>+</sup>] = 384  
99.5%

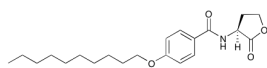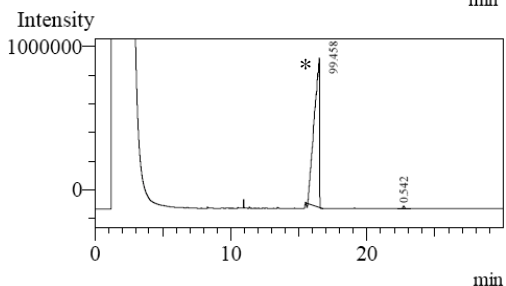

**R8**  
exp [M<sup>+</sup>] = 375;  
obs [M+Na<sup>+</sup>] = 398  
99.1%

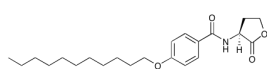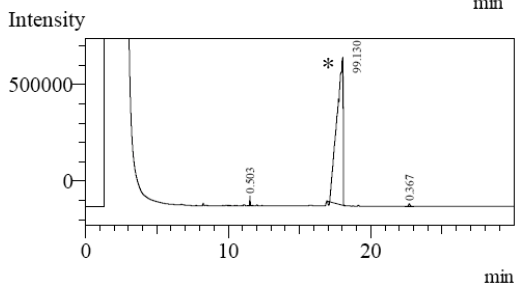

**R9**  
exp [M<sup>+</sup>] = 389;  
obs [M+Na<sup>+</sup>] = 412  
97.8%

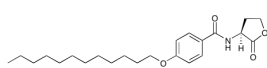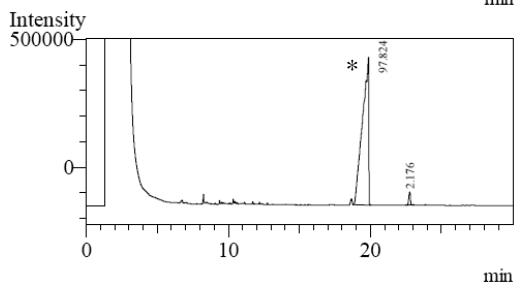

**S1**  
exp  $[M^+] = 227$ ;  
obs  $[M+H^+] = 228$   
100%

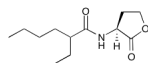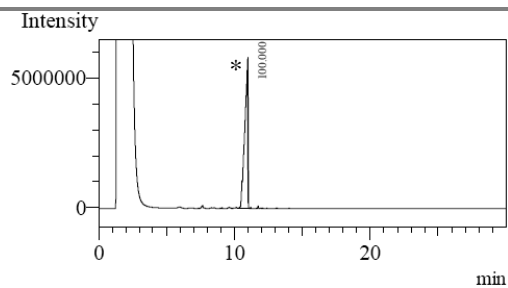

**S2**  
exp  $[M^+] = 283$ ;  
obs  $[M+H^+] = 284$   
99.5%

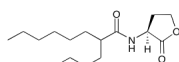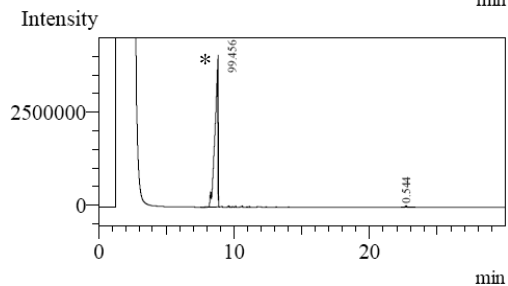

**S3**  
exp  $[M^+] = 339$ ;  
obs  $[M+H^+] = 340$   
95.0%

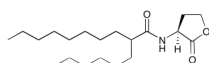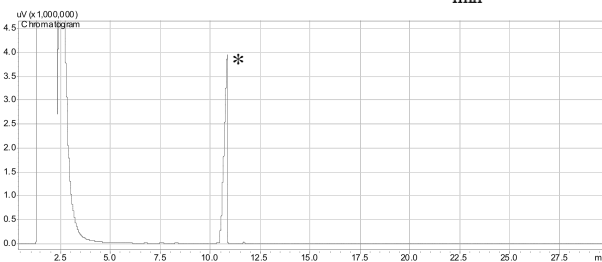

**S4**  
exp  $[M^+] = 197$ ;  
obs  $[M+Na^+] = 220$   
94.6%

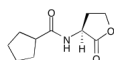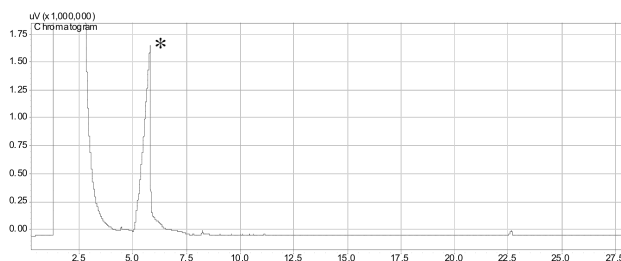

**S5**  
exp  $[M^+] = 211$ ;  
obs  $[M+Na^+] = 234$   
94.5%

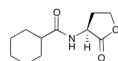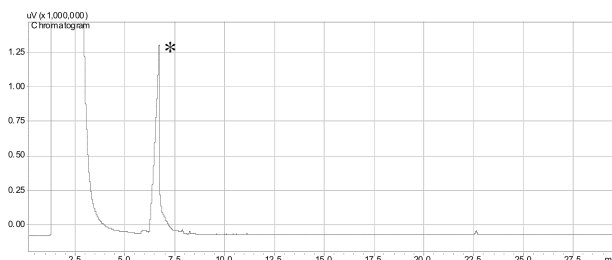

**S6**  
exp  $[M^+] = 225$ ;  
obs  $[M+Na^+] = 248$   
96.5%

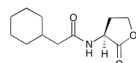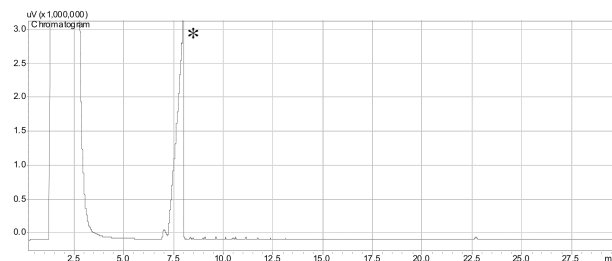

**S7**  
exp  $[M^+]$  = 253;  
obs  $[M+Na^+]$  = 276  
93.9%

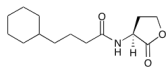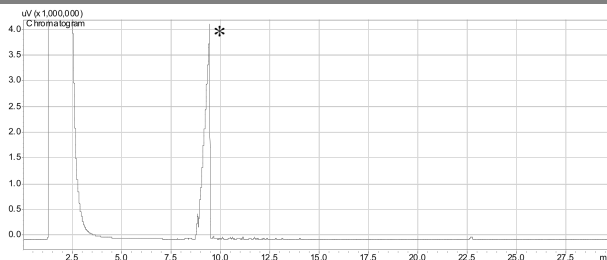

### **Characterization data for active AHLs in Libraries Q, R, and S.**

$^1\text{H}$  and  $^{13}\text{C}$  NMR data are provided for all compounds; IR and  $[\alpha]_D^{25}$  data are also provided for active compounds.

**Q1:**  $^1\text{H}$  NMR: (299.7 MHz,  $\text{CDCl}_3$ )  $\delta$  7.60 (Ar-H, td,  $J = 1.3, 7.8$  Hz, 2H), 7.38 (Ar-H, td,  $J = 1.3, 7.5$  Hz, 1H), 7.31 (Ar-H, td,  $J = 1.9, 7.8$  Hz, 1H), 6.63 (NH, s, 1H), 4.73 (CH-lac, ddd,  $J = 5.8, 8.6, 11.6$  Hz, 1H), 4.53 (CH-lac, td,  $J = 1.1, 9.2$  Hz, 1H), 4.35 (CH-lac, ddd,  $J = 5.8, 9.3, 11.2$  Hz, 1H), 3.01 (CH-lac, dddd,  $J = 1.2, 5.9, 7.1, 12.5$  Hz, 1H), 2.32 (CH-lac, dtd,  $J = 8.9, 11.4, 20.4$  Hz, 1H).

**Q2:**  $^1\text{H}$  NMR: (299.7 MHz,  $\text{CDCl}_3$ )  $\delta$  7.93 (CH, t,  $J = 1.8$  Hz, 1H), 7.70 (Ar-H, ddd,  $J = 0.6, 1.1, 7.6$  Hz, 1H), 7.64 (Ar-H, ddd,  $J = 1.0, 2.0, 8.0$  Hz, 1H), 7.30 (Ar-H, t,  $J = 7.9$  Hz, 1H), 6.95 (NH, d,  $J = 2.7$  Hz, 1H), 4.79 (CH-lac, ddd,  $J = 6.1, 8.6, 11.6$  Hz, 1H), 4.54 (CH-lac, td,  $J = 1.1, 9.2$  Hz, 1H), 4.36 (CH-lac, ddd,  $J = 5.9, 9.3, 11.3$  Hz, 1H), 2.93 (CH-lac, dddd,  $J = 1.2, 5.9, 7.1, 12.5$  Hz, 1H), 2.29 (CH-lac, dtd,  $J = 8.8, 11.5, 20.5$  Hz, 1H).

**Q3:**  $^1\text{H}$  NMR: (299.7 MHz,  $\text{CDCl}_3$ )  $\delta$  7.81 (Ar-H, ddd,  $J = 2.9, 5.1, 8.2$  Hz, 2H), 7.1 (Ar-H, tt,  $J = 3.0, 8.5$  Hz, 2H), 6.83 (NH, d,  $J = 4.7$  Hz, 1H), 4.76 (CH-lac, ddd,  $J = 5.8, 8.5, 11.5$  Hz, 1H), 4.53 (CH-lac, td,  $J = 1.1, 9.2$  Hz, 1H), 4.36 (CH-lac, ddd,  $J = 6.0, 9.5, 11.5$  Hz, 1H), 2.94 (CH-lac, dddd,  $J = 1.2, 5.9, 7.0, 12.5$  Hz, 1H), 2.28 (CH-lac, dtd,  $J = 8.8, 11.4, 12.2$  Hz, 1H).

**Q4:**  $^1\text{H}$  NMR: (299.7 MHz, DMSO)  $\delta$  9.04 (NH, d,  $J = 8.0$  Hz, 1H), 7.86 (Ar-H, dt,  $J = 2.5, 9.2$  Hz, 2H), 7.56 (Ar-H, dt,  $J = 2.5, 9.2$  Hz, 2H), 4.75 (CH-lac, ddd,  $J = 8.2, 9.2, 10.8$  Hz, 1H), 4.40 (CH-lac, td,  $J = 1.9, 8.8$  Hz, 1H), 4.26 (CH-lac, ddd,  $J = 6.6, 8.8, 10.4$  Hz, 1H), 2.43 (CH-lac, m, 1H), 2.31 (CH-lac, dtd,  $J = 9.0, 10.6, 11.9$  Hz, 1H);  $^{13}\text{C}$  NMR: (75.4 MHz, DMSO)  $\delta$  176.06, 165.67, 137.18, 132.87, 129.87, 129.33, 66.05, 49.16, 28.21; IR ( $\text{cm}^{-1}$ ): 3260, 1788, 1765, 1647, 1597, 1546, 1487, 1379, 1320, 1167, 1014, 858, 764, 672;  $[\alpha]_D^{25}$ (DMSO,  $c = 8.16$  mg/ml):  $-36.3^\circ$ .

**Q5:**  $^1\text{H}$  NMR: (299.7 MHz, DMSO)  $\delta$  9.02 (NH, d,  $J = 8.0$  Hz, 1H), 7.87 (Ar-H, dt,  $J = 2.3, 8.9$  Hz, 2H), 7.62 (Ar-H, dt,  $J = 2.2, 8.8$  Hz, 2H), 4.75 (CH-lac, ddd,  $J = 8.2, 9.1, 10.7$  Hz, 1H), 4.39 (CH-lac, td,  $J = 2.0, 8.8$  Hz, 1H), 4.25 (CH-lac, ddd,  $J = 6.6, 8.9, 10.4$  Hz, 1H), 2.42 (CH-lac, m, 1H), 2.30 (CH-lac, dtd,  $J = 9.0, 10.6, 11.9$  Hz, 1H);  $^{13}\text{C}$  NMR: (75.4 MHz, DMSO)  $\delta$  175.88,

166.19, 138.04, 133.33, 129.95, 100.21, 66.04, 49.07, 28.43; IR (cm<sup>-1</sup>): 3256, 1787, 1765, 1647, 1590, 1545, 1321, 1168, 1021, 1007, 760, 716, 674; [ $\alpha$ ]<sub>D</sub><sup>25</sup> (DMSO, c = 8.00 mg/ml): + 8.56°.

**Q6:** <sup>1</sup>H NMR: (299.7 MHz, CDCl<sub>3</sub>)  $\delta$  7.78 (Ar-H, dt, J = 2.9, 5.0 Hz, 2H), 6.94 (Ar-H, dt, J = 3.0, 5.1 Hz, 2H), 6.52 (NH, d, J = 3.6 Hz, 1H), 4.69 (CH-lac, ddd, J = 5.2, 8.4, 11.6 Hz, 1H), 4.53 (CH-lac, td, J = 0.9, 9.0 Hz, 1H), 4.35 (CH-lac, ddd, J = 5.8, 9.3, 11.3 Hz, 1H), 3.86 (CH<sub>3</sub>, s, 2H), 3.00 (CH-lac, dddd, J = 1.1, 5.8, 6.9, 12.5 Hz, 1H), 2.24 (CH-lac, dddd, J = 8.9, 11.5, 12.5, 20.3 Hz, 1H).

**Q7:** <sup>1</sup>H NMR: (299.7 MHz, CDCl<sub>3</sub>)  $\delta$  8.30 (Ar-H, dt, J = 2.4, 9.2 Hz, 2H), 7.98 (Ar-H, dt, J = 2.3, 9.2 Hz, 2H), 6.84 (NH, d, J = 4.2 Hz, 1H), 4.76 (CH-lac, ddd, J = 5.6, 8.5, 11.7 Hz, 1H), 4.57 (CH-lac, td, J = 0.9, 9.2 Hz, 1H), 4.39 (CH-lac, ddd, J = 5.8, 9.4, 11.4 Hz, 1H), 11.4 (CH-lac, dddd, J = 1.0, 5.7, 6.9, 12.6 Hz, 1H), 2.30 (CH-lac, dtd, J = 8.9, 11.5, 12.5 Hz, 1H).

**Q8:** <sup>1</sup>H NMR: (299.7 MHz, CDCl<sub>3</sub>)  $\delta$  7.70 (Ar-H, apparent doublet, J = 8.2 Hz, 2H), 7.25 (Ar-H, apparent doublet, J = 7.0 Hz, 2H), 6.61 (NH, d, J = 3.2 Hz, 1H), 4.71 (CH-lac, ddd, J = 5.4, 8.6, 11.8 Hz, 1H), 4.53 (CH-lac, td, J = 0.7, 9.4 Hz, 1H), 4.35 (CH-lac, ddd, J = 5.8, 9.3, 11.3 Hz, 1H), 3.00 (CH-lac, dddd, J = 1.0, 5.7, 6.8, 12.5 Hz, 1H), 2.41 (CH<sub>3</sub>, s, 3H), 2.24 (CH-lac, dtd, J = 8.8, 11.5, 12.5 Hz, 1H).

**Q9:** <sup>1</sup>H NMR: (299.7 MHz, CDCl<sub>3</sub>)  $\delta$  7.75 (Ar-H, dt, J = 3.0, 9.7 Hz, 2H), 6.89 (Ar-H, dt, J = 2.9, 9.7 Hz, 2H), 6.72 (NH, d, J = 5.6 Hz, 1H), 4.74 (CH-lac, ddd, J = 5.7, 8.6, 11.5 Hz, 1H), 4.52 (CH-lac, td, J = 1.0, 9.1 Hz, 1H), 4.34 (CH-lac, ddd, J = 5.9, 9.3, 11.2 Hz, 1H), 3.99 (CH<sub>2</sub>, t, J = 6.6 Hz, 2H), 2.94 (CH-lac, dddd, J = 1.2, 5.8, 7.1, 12.5 Hz, 1H), 2.26 (CH-lac, dtd, J = 8.9, 11.5, 12.4 Hz, 1H), 1.79 (CH<sub>2</sub>, apparent pentet, J = 6.6 Hz, 2H), 1.38 (CH<sub>2</sub>, m, 10H), 0.89 (CH<sub>3</sub>, apparent triplet, J = 7.0 Hz, 3H); <sup>13</sup>C NMR: (75.4 MHz, CDCl<sub>3</sub>)  $\delta$  176.11, 167.56, 162.54, 129.21, 125.14, 114.54, 68.46, 66.49, 49.92, 32.01, 30.91, 29.54, 29.42, 29.32, 26.20, 22.86, 14.30; IR (cm<sup>-1</sup>): 3267, 2924, 1776, 1640, 1609, 1543, 1508, 1383, 1303, 1252, 1220, 1180, 1017, 841; [ $\alpha$ ]<sub>D</sub><sup>25</sup> (CHCl<sub>3</sub>, c = 8.48 mg/ml): + 23.8°.

**Q10:** <sup>1</sup>H NMR: (299.7 MHz, CDCl<sub>3</sub>)  $\delta$  7.78 (Ar-H, dt, J = 2.8, 9.6 Hz, 2H), 7.49 (Ar-H, dt, J = 3.2, 10.0 Hz, 2H), 6.98 (Ar-H, dt, J = 2.7, 9.6 Hz, 2H), 6.92 (Ar-H, dt, J = 3.3, 10.1 Hz, 2H), 6.82 (NH, d, J = 5.6 Hz, 1H), 4.77 (CH-lac, ddd, J = 5.9, 8.6, 11.6 Hz, 1H), 4.53 (CH-lac, td, J = 0.8, 9.1 Hz, 1H), 4.35 (CH-lac, ddd, J = 5.9, 9.3, 11.2 Hz, 1H), 2.94 (CH-lac, dddd, J = 1.0, 5.9, 7.0, 12.6 Hz, 1H), 2.27 (CH-lac, ddd, J = 8.9, 11.5, 20.5 Hz, 1H); <sup>13</sup>C NMR: (75.4 MHz, CDCl<sub>3</sub>)  $\delta$  176.18, 167.23, 160.72, 155.24, 133.24, 129.47, 127.95, 121.70, 118.11, 117.24, 66.53, 49.93, 30.79; IR (cm<sup>-1</sup>): 3268, 2924, 1775, 1638, 1504, 1482, 1378, 1242, 1172, 1010, 864, 846; [ $\alpha$ ]<sub>D</sub><sup>25</sup> (CHCl<sub>3</sub>, c = 8.08 mg/ml): + 22.0°.

**Q11:** <sup>1</sup>H NMR: (299.7 MHz, CDCl<sub>3</sub>)  $\delta$  7.35 (Ar-H, dd, J = 1.8, 8.1 Hz, 1H), 7.31 (Ar-H, d, J = 1.7 Hz, 1H), 6.86 (Ar-H, d, J = 8.1 Hz, 1H), 6.50 (NH, d, J = 3.8 Hz, 1H), 6.05 (CH<sub>2</sub>, s, 2H), 4.69 (CH-lac, ddd, J = 5.2, 8.5, 11.7 Hz, 1H), 4.54 (CH-lac, td, J = 0.9, 9.2 Hz, 1H), 4.36 (CH-lac, ddd, J = 5.8, 9.4, 11.4 Hz, 1H), 3.00 (CH-lac, dddd, J = 1.0, 5.8, 6.9, 12.7 Hz, 1H), 2.23 (CH-lac, dtd, J = 8.9, 11.6, 12.4 Hz, 1H).



**Q12:**  $^1\text{H}$  NMR: (299.7 MHz,  $\text{CDCl}_3$ )  $\delta$  7.89 (Ar-H, dt,  $J = 2.0, 8.6$  Hz, 2H), 7.68 (Ar-H, dt,  $J = 1.8, 8.5$  Hz, 2H), 7.62 (Ar-H, dt,  $J = 1.5, 7.1$  Hz, 2H), 7.43 (Ar-H, m, 3H), 6.67 (NH, d,  $J = 4.9$  Hz, 1H), 4.74 (CH-lac, ddd,  $J = 5.2, 8.5, 11.7$  Hz, 1H), 4.55 (CH-lac, td,  $J = 0.8, 9.2$  Hz, 1H), 4.37 (CH-lac, ddd,  $J = 5.9, 9.4, 11.4$  Hz, 1H), 3.04 (CH-lac, dddd,  $J = 1.1, 5.7, 6.8, 12.5$  Hz, 1H), 2.27 (CH-lac, dtd,  $J = 8.8, 11.4, 12.5$  Hz, 1H); IR ( $\text{cm}^{-1}$ ): 3280, 1776, 1635, 1546, 1486, 1385, 1331, 1175, 1169, 1017, 1000, 748, 692;  $[\alpha]_{\text{D}}^{25}$  (DMSO,  $c = 8.64$  mg/ml):  $-4.97^\circ$ ;  $\text{CHCl}_3$ .

**Q13:**  $^1\text{H}$  NMR: (299.7 MHz, DMSO)  $\delta$  9.64 (NH, s, 1H), 8.80 (NH, d,  $J = 8.0$  Hz, 1H), 7.76 (Ar-H, dt,  $J = 1.8, 7.0$  Hz, 2H), 7.53 (Ar-H, dt,  $J = 1.8, 7.0$  Hz, 2H), 4.72 (H-lac, ddd,  $J = 8.2, 9.1, 10.6$  Hz, 1H), 4.39 (H-lac, td,  $J = 1.9, 8.7$  Hz, 1H), 4.25 (H-lac, ddd,  $J = 6.6, 8.8, 10.3$  Hz, 1H), 2.42 (H-lac, m, 1H), 2.31 (H-lac, m, 1H), 1.47 ( $\text{CH}_3$ , s, 9H);  $^{13}\text{C}$  NMR: (75.4 MHz, DMSO)  $\delta$  176.18, 166.25, 153.26, 143.39, 128.74, 127.51, 117.82, 106.47, 80.11, 65.89, 48.97, 28.56; IR ( $\text{cm}^{-1}$ ): 3333, 1775, 1696, 1643, 1613, 1518, 1370, 1317, 1247, 1160, 1062, 1017, 846, 757, 644;  $[\alpha]_{\text{D}}^{25}$  (DMSO,  $c = 7.04$  mg/ml):  $-24.9^\circ$ .

**R1:**  $^1\text{H}$  NMR: (299.7 MHz,  $\text{CDCl}_3$ )  $\delta$  7.76 (Ar-H, dt,  $J = 2.9, 9.7$  Hz, 2H), 6.90 (Ar-H, dt,  $J = 2.9, 9.8$  Hz, 2H), 6.68 (NH, d,  $J = 5.2$  Hz, 1H), 4.73 (CH-lac, ddd,  $J = 5.7, 8.7, 11.6$  Hz, 1H), 4.52 (CH-lac, td,  $J = 1.1, 9.1$  Hz, 1H), 4.34 (CH-lac, ddd,  $J = 5.9, 9.2, 11.3$  Hz, 1H), 4.08 ( $\text{CH}_2$ , q,  $J = 7.1$  Hz, 2H), 2.95 (CH-lac, dddd,  $J = 1.2, 6.0, 7.1, 12.6$  Hz, 1H), 2.25 (CH-lac, dtd,  $J = 8.9, 11.4, 12.5$  Hz, 1H), 1.43 ( $\text{CH}_3$ , t,  $J = 6.9$  Hz, 3H);  $^{13}\text{C}$  NMR: (75.4 MHz, DMSO)  $\delta$  176.15, 166.29, 161.98, 129.82, 126.28, 114.68, 65.85, 64.02, 49.03, 28.57, 14.96; IR ( $\text{cm}^{-1}$ ): 3337, 2984, 2918, 2882, 1800, 1625, 1530, 1500, 1260, 1190, 1015, 865, 621;  $[\alpha]_{\text{D}}^{25}$  ( $\text{CHCl}_3$ ,  $c = 8.08$  mg/ml):  $+34.6^\circ$ .

**R2:**  $^1\text{H}$  NMR: (299.7 MHz,  $\text{CDCl}_3$ )  $\delta$  7.76 (Ar-H, dt,  $J = 2.8, 9.7$  Hz, 2H), 6.92 (Ar-H, dt,  $J = 2.8, 9.6$  Hz, 2H), 6.57 (NH, d,  $J = 4.7$  Hz, 1H), 4.71 (CH-lac, ddd,  $J = 5.4, 8.5, 11.6$  Hz, 1H), 4.53 (CH-lac, td,  $J = 0.9, 9.2$  Hz, 1H), 4.35 (CH-lac, ddd,  $J = 5.9, 9.3, 11.3$  Hz, 1H), 3.97 (CH-lac, t,  $J = 6.6$  Hz, 2H), 2.99 (CH-lac, dddd,  $J = 1.0, 5.8, 7.0, 12.6$  Hz, 1H), 2.24 (CH-lac, dtd,  $J = 8.8, 11.5, 12.4$  Hz, 1H), 1.83 ( $\text{CH}_2$ , sextet,  $J = 7.3$  Hz, 2H), 1.05 ( $\text{CH}_3$ , t,  $J = 7.5$  Hz, 3H).

**R3:**  $^1\text{H}$  NMR: (299.7 MHz,  $\text{CDCl}_3$ )  $\delta$  7.75 (Ar-H, dt,  $J = 3.0, 9.8$  Hz, 2H), 6.90 (Ar-H, dt,  $J = 2.9, 9.7$  Hz, 2H), 6.57 (NH, d,  $J = 4.9$  Hz, 1H), 4.71 (CH-lac, ddd,  $J = 5.4, 8.6, 11.6$  Hz, 1H), 4.62 (CH, septet,  $J = 6.1$  Hz, 1H), 4.53 (CH-lac, td,  $J = 0.9, 9.3$  Hz, 1H), 4.35 (CH-lac, ddd,  $J = 5.8, 9.3, 11.3$  Hz, 1H), 2.98 (CH-lac, dddd,  $J = 1.1, 5.7, 6.9, 12.5$  Hz, 1H), 2.24 (CH-lac, dtd,  $J = 8.8, 11.4, 12.3$  Hz, 1H), 1.36 ( $\text{CH}_3$ , d,  $J = 6.1$  Hz, 6H).

**R4:**  $^1\text{H}$  NMR: (299.7 MHz,  $\text{CDCl}_3$ )  $\delta$  7.75 (Ar-H, dt,  $J = 2.8, 9.7$  Hz, 2H), 6.89 (Ar-H, dt,  $J = 2.8, 9.7$  Hz, 2H), 6.74 (NH, d,  $J = 5.6$  Hz, 1H), 4.74 (CH-lac, ddd,  $J = 5.7, 8.6, 11.6$  Hz, 1H), 4.51 (CH-lac, td,  $J = 1.0, 9.1$  Hz, 1H), 4.34 (CH-lac, ddd,  $J = 5.9, 9.3, 11.2$  Hz, 1H), 4.00 ( $\text{CH}_2$ , t,  $J = 6.5$  Hz, 2H), 2.93 (CH-lac, dddd,  $J = 1.2, 5.9, 7.2, 12.5$  Hz, 1H), 2.26 (CH-lac, dtd,  $J = 8.9, 11.4, 12.3$  Hz, 1H), 1.78 ( $\text{CH}_2$ , apparent pentet,  $J = 6.6$  Hz, 2H), 1.50 ( $\text{CH}_2$ , apparent sextet,  $J = 7.4$  Hz, 2H), 0.98 ( $\text{CH}_3$ , t,  $J = 7.3$  Hz, 3H);  $^{13}\text{C}$  NMR: (75.4 MHz,  $\text{CDCl}_3$ )  $\delta$  176.14, 167.55, 162.53, 129.20, 125.14, 114.54, 68.13, 66.49, 49.90, 31.36, 30.88, 19.40, 14.02; IR ( $\text{cm}^{-1}$ ): 3275, 2933, 1774, 1641, 1609, 1543, 1507, 1382, 1303, 1252, 1224, 1016, 841;  $[\alpha]_{\text{D}}^{25}$  ( $\text{CHCl}_3$ ,  $c = 8.16$  mg/ml):  $+30.4^\circ$ .

**R5:**  $^1\text{H}$  NMR: (299.7 MHz,  $\text{CDCl}_3$ )  $\delta$  7.75 (Ar-H, dt,  $J = 2.9, 9.7$  Hz, 2H), 6.90 (Ar-H, dt,  $J = 2.8, 9.7$  Hz, 2H), 6.72 (NH, d,  $J = 5.6$  Hz, 1H), 4.74 (CH-lac, ddd,  $J = 5.7, 8.6, 11.5$  Hz, 1H), 4.52 (CH-lac, td,  $J = 0.9, 9.0$  Hz, 1H), 4.34 (CH-lac, ddd,  $J = 5.9, 9.3, 11.3$  Hz, 1H), 3.99 ( $\text{CH}_2$ , t,  $J = 6.6$  Hz, 2H), 2.94 (CH-lac, dddd,  $J = 1.0, 5.8, 7.1, 12.5$  Hz, 1H), 2.26 (CH-lac, apparent dd,  $J = 9.0, 11.9$  Hz, 1H), 1.80 ( $\text{CH}_2$ , p,  $J = 6.7$  Hz, 2H), 1.42 ( $\text{CH}_2$ , m, 4H), 0.94 ( $\text{CH}_3$ , t,  $J = 7.0$  Hz, 3H);  $^{13}\text{C}$  NMR: (75.4 MHz,  $\text{CDCl}_3$ )  $\delta$  176.12, 167.54, 162.53, 129.21, 125.15, 114.55, 68.44, 66.49, 58.39, 30.90, 29.01, 28.34, 22.64, 14.21; IR ( $\text{cm}^{-1}$ ): 3272, 2935, 1774, 1641, 1609, 1544, 1508, 1382, 1303, 1252, 1180, 1016, 841;  $[\alpha]_{\text{D}}^{25}$  ( $\text{CHCl}_3$ ,  $c = 8.80$  mg/ml): + 28.6°.

**R6:**  $^1\text{H}$  NMR: (299.7 MHz,  $\text{CDCl}_3$ )  $\delta$  7.75 (Ar-H, dt,  $J = 2.9, 9.8$  Hz, 2H), 6.90 (Ar-H, dt,  $J = 2.8, 9.7$  Hz, 2H), 6.70 (NH, d,  $J = 5.6$  Hz, 1H), 4.73 (CH-lac, ddd,  $J = 5.7, 8.5, 11.5$  Hz, 1H), 4.52 (CH-lac, td,  $J = 1.1, 9.2$  Hz, 1H), 4.34 (CH-lac, ddd,  $J = 5.8, 9.4, 11.3$  Hz, 1H), 3.99 ( $\text{CH}_2$ , t,  $J = 6.6$  Hz, 2H), 2.95 (CH-lac, dddd,  $J = 1.1, 5.8, 7.1, 12.5$  Hz, 1H), 2.25 (CH-lac, dtd,  $J = 8.9, 11.4, 12.4$  Hz, 1H), 1.79 ( $\text{CH}_2$ , apparent pentet,  $J = 6.6$  Hz, 2H), 1.37 ( $\text{CH}_2$ , m, 8H), 0.90 ( $\text{CH}_3$ , t,  $J = 6.5$  Hz, 3H);  $^{13}\text{C}$  NMR: (75.4 MHz,  $\text{CDCl}_3$ )  $\delta$  176.09, 167.63, 162.55, 129.21, 125.14, 114.55, 68.46, 66.49, 58.24, 49.84, 31.97, 30.93, 29.23, 26.16, 22.81, 14.29;  $[\alpha]_{\text{D}}^{25}$  ( $\text{CHCl}_3$ ,  $c = 9.04$  mg/ml): + 26.6°; IR ( $\text{cm}^{-1}$ ): 3272, 2932, 1774, 1641, 1609, 1543, 1507, 1252, 1180, 1016, 841.

**R7:**  $^1\text{H}$  NMR: (299.7 MHz,  $\text{CDCl}_3$ )  $\delta$  7.76 (Ar-H, dt,  $J = 2.9, 9.8$  Hz, 2H), 6.92 (Ar-H, dt,  $J = 2.8, 9.7$  Hz, 2H), 6.54 (NH, d,  $J = 5.1$  Hz, 1H), 4.70 (CH-lac, ddd,  $J = 5.3, 8.5, 11.7$  Hz, 1H), 4.53 (CH-lac, t,  $J = 9.0$  Hz, 1H), 4.35 (CH-lac, ddd,  $J = 5.8, 9.3, 11.3$  Hz, 1H), 4.00 ( $\text{CH}_2$ , t,  $J = 6.5$  Hz, 2H), 2.99 (CH-lac, dddd,  $J = 0.9, 5.9, 6.9, 12.7$  Hz, 1H), 2.24 (CH-lac, ddd,  $J = 8.9, 11.6, 20.5$  Hz, 1H), 1.80 ( $\text{CH}_2$ , pentet,  $J = 6.7$  Hz, 2H), 1.27 ( $\text{CH}_2$ , m, 16H), 0.88 ( $\text{CH}_3$ , t,  $J = 6.9$  Hz, 3H).

**R8:**  $^1\text{H}$  NMR: (299.7 MHz,  $\text{CDCl}_3$ )  $\delta$  7.76 (Ar-H, dt,  $J = 3.0, 9.8$  Hz, 2H), 6.92 (Ar-H, dt,  $J = 2.9, 9.8$  Hz, 2H), 6.52 (NH, d,  $J = 4.9$  Hz, 1H), 4.69 (CH-lac, ddd,  $J = 5.3, 8.5, 11.6$  Hz, 1H), 4.53 (CH-lac, td,  $J = 0.7, 8.9$  Hz, 1H), 4.35 (CH-lac, ddd,  $J = 5.8, 9.2, 11.2$  Hz, 1H), 4.00 ( $\text{CH}_2$ , t,  $J = 6.6$  Hz, 2H), 3.00 (CH-lac, dddd,  $J = 0.9, 5.8, 6.9, 12.6$  Hz, 1H), 2.23 (CH-lac, dtd,  $J = 8.9, 11.5, 12.6$  Hz, 1H), 1.79 ( $\text{CH}_2$ , apparent pentet,  $J = 6.6$  Hz, 2H), 1.36 ( $\text{CH}_2$ , m, 16H), 0.88 ( $\text{CH}_3$ , t,  $J = 6.3$  Hz, 3H).

**R9:**  $^1\text{H}$  NMR: (299.7 MHz,  $\text{CDCl}_3$ )  $\delta$  7.76 (Ar-H, dt,  $J = 3.0, 9.8$  Hz, 2H), 6.92 (Ar-H, dt,  $J = 2.9, 9.8$  Hz, 2H), 6.53 (NH, d,  $J = 5.1$  Hz, 1H), 4.70 (CH-lac, ddd,  $J = 5.2, 8.5, 11.6$  Hz, 1H), 4.53 (CH-lac, td,  $J = 0.9, 9.0$  Hz, 1H), 4.35 (CH-lac, ddd,  $J = 5.8, 9.4, 11.3$  Hz, 1H), 4.00 ( $\text{CH}_2$ , t,  $J = 6.6$  Hz, 2H), 6.6 (CH-lac, dddd,  $J = 1.0, 5.8, 7.0, 12.6$  Hz, 1H), 2.24 (CH-lac, dtd,  $J = 8.9, 11.5, 12.4$  Hz, 1H), 1.80 ( $\text{CH}_2$ , apparent pentet,  $J = 6.7$  Hz, 2H), 1.38 ( $\text{CH}_2$ , m, 18H), 0.88 ( $\text{CH}_3$ , t,  $J = 6.3$  Hz, 3H).

**S1:**  $^1\text{H}$  NMR: (299.7 MHz,  $\text{CDCl}_3$ )  $\delta$  6.03 (NH, d,  $J = 4.1$  Hz, 1H), 4.53 (CH-lac, ddd,  $J = 2.9, 5.6, 8.5$  Hz, 1H), 4.48 (CH-lac, td,  $J = 1.3, 9.1$  Hz, 1H), 4.29 (CH-lac, ddd,  $J = 6.0, 9.4, 11.3$  Hz, 1H), 2.89 (CH-lac, dddd,  $J = 1.0, 5.8, 7.2, 12.6$  Hz, 1H), 2.08 (CH-lac and CH, m, 2H), 1.53 ( $\text{CH}_2$ , m, 4H), 1.28 ( $\text{CH}_2$ , m, 4H), 0.89 ( $\text{CH}_3$ , m, 6H);  $^{13}\text{C}$  NMR: (75.4 MHz,  $\text{CDCl}_3$ )  $\delta$  176.86, 175.67, 66.31, 58.20, 49.47, 32.44, 30.76, 29.73, 26.05, 22.77, 14.14, 11.83; IR ( $\text{cm}^{-1}$ ): 3295, 2932, 1777, 1644, 1544, 1381, 1178, 1022;  $[\alpha]_{\text{D}}^{25}$  ( $\text{CHCl}_3$ ,  $c = 11.4$  mg/ml): + 2.20°.

**S2:**  $^1\text{H}$  NMR: (299.7 MHz,  $\text{CDCl}_3$ )  $\delta$  5.98 (NH, d,  $J = 5.1$  Hz, 1H), 4.54 (CH-lac, ddd,  $J = 1.1, 5.5, 6.8$  Hz, 1H), 4.47 (CH-lac, td,  $J = 1.0, 9.2$  Hz, 1H), 4.29 (CH-lac, ddd,  $J = 6.0, 9.3, 11.3$  Hz, 1H), 2.89 (CH-lac, dddd,  $J = 1.1, 5.8, 7.0, 12.6$  Hz, 1H), 2.10 (CH-lac and CH, m, 2H), 1.60 ( $\text{CH}_2$ , m, 2H), 1.44 ( $\text{CH}_2$ , m, 2H), 1.27 ( $\text{CH}_2$ , m, 12H), 0.88 ( $\text{CH}_3$ , m, 6H);  $^{13}\text{C}$  NMR: (75.4 MHz,  $\text{CDCl}_3$ )  $\delta$  177.03, 175.66, 111.23, 66.32, 58.28, 49.46, 47.77, 33.23, 32.90, 31.90, 30.96, 29.94, 29.54, 27.74, 22.94, 14.26; IR ( $\text{cm}^{-1}$ ): 3292, 2930, 1774, 1646, 1542, 1379, 1168, 1018;  $[\alpha]_{\text{D}}^{25}$  ( $\text{CHCl}_3$ ,  $c = 8.96$  mg/ml): + 5.78°.

**S3:**  $^1\text{H}$  NMR: (299.7 MHz,  $\text{CDCl}_3$ )  $\delta$  5.97 (NH, d,  $J = 5.5$  Hz, 1H), 4.51 (CH-lac, ddd,  $J = 5.7, 8.7, 11.6$  Hz, 1H), 4.47 (CH-lac, td,  $J = 1.0, 9.3$  Hz, 1H), 4.28 (CH-lac, ddd,  $J = 5.9, 9.3, 11.3$  Hz, 1H), 2.90 (CH-lac, dddd,  $J = 1.2, 5.9, 7.1, 12.6$  Hz, 1H), 2.10 (CH-lac and CH, m, 2H), 1.59 ( $\text{CH}_2$ , m, 2H), 1.43 ( $\text{CH}_2$ , m, 2H), 1.26 ( $\text{CH}_2$ , m, 20H), 0.87 ( $\text{CH}_3$ , t,  $J = 6.1$  Hz, 6H);  $^{13}\text{C}$  NMR: (75.4 MHz,  $\text{CDCl}_3$ )  $\delta$  177.04, 175.64, 111.26, 66.33, 58.57, 49.46, 47.80, 33.21, 33.13, 32.05, 31.91, 30.98, 29.83, 29.64, 29.54, 27.78, 27.75, 22.86, 22.79, 14.30; IR ( $\text{cm}^{-1}$ ): 3288, 2925, 2853, 1798, 1643, 1547, 1176, 1033, 687;  $[\alpha]_{\text{D}}^{25}$  ( $\text{CHCl}_3$ ,  $c = 11.8$  mg/ml): + 5.39°.

**S4:**  $^1\text{H}$  NMR: (299.7 MHz,  $\text{CDCl}_3$ )  $\delta$  5.96 (NH, s,  $J =$  Hz, 1H), 4.52 (CH-lac, ddd,  $J = 5.6, 8.7, 11.7$  Hz, 1H), 4.47 (CH-lac, td,  $J = 0.9, 9.8$  Hz, 1H), 4.28 (CH-lac, ddd,  $J = 5.9, 9.3, 11.3$  Hz, 1H), 2.87 (CH-lac, dddd,  $J = 1.0, 5.9, 7.0, 12.6$  Hz, 1H), 2.61 (CH, apparent pentet,  $J = 8.1$  Hz, 1H), 2.12 (CH-lac, dtd,  $J = 8.9, 11.5, 12.6$  Hz, 1H), 1.81 ( $\text{CH}_2$ , m, 6H), 1.58 ( $\text{CH}_2$ , m, 2H).

**S5:**  $^1\text{H}$  NMR: (299.7 MHz,  $\text{CDCl}_3$ )  $\delta$  5.94 (NH, s, 1H), 4.51 (CH-lac, ddd,  $J = 5.5, 8.6, 11.6$  Hz, 1H), 4.47 (CH-lac, td,  $J = 1.3, 9.4$  Hz, 1H), 4.29 (CH-lac, ddd,  $J = 5.7, 9.3, 11.2$  Hz, 1H), 2.88 (CH-lac, dddd,  $J = 1.0, 5.7, 6.9, 12.5$  Hz, 1H), 2.13 (CH-lac and CH, m, 2H), 1.85 ( $\text{CH}_2$ , m, 4H), 1.68 ( $\text{CH}_2$ , m, 1H), 1.45 ( $\text{CH}_2$ , m, 2H), 1.29 ( $\text{CH}_2$ , m, 3H).

**S6:**  $^1\text{H}$  NMR: (299.7 MHz,  $\text{CDCl}_3$ )  $\delta$  6.36 (NH, d,  $J = 1.7$  Hz, 1H), 4.55 (CH-lac, ddd,  $J = 6.1, 8.6, 11.5$  Hz, 1H), 4.47 (CH-lac, td,  $J = 1.3, 9.2$  Hz, 1H), 4.28 (CH-lac, ddd,  $J = 5.9, 9.2, 11.1$  Hz, 1H), 2.82 (CH-lac, dddd,  $J = 1.4, 6.0, 7.4, 12.6$  Hz, 1H), 2.15 (H-lac, dtd,  $J = 8.9, 11.3, 12.5$  Hz, 1H), 2.13 ( $\text{CH}_2$ , d,  $J = 1.6$  Hz, 2H), 1.72 ( $\text{CH}_2$ , m, 6H), 1.23 ( $\text{CH}_2$  and CH, m, 3H), 0.96 ( $\text{CH}_2$ , m, 2H);  $^{13}\text{C}$  NMR: (75.4 MHz,  $\text{CDCl}_3$ )  $\delta$  175.77, 173.31, 66.08, 49.17, 44.23, 40.73, 35.37, 33.14, 30.47, 26.10; IR ( $\text{cm}^{-1}$ ): 3307, 2918, 2850, 1776, 1643, 1552, 1378, 1172, 1013, 1001;  $[\alpha]_{\text{D}}^{25}$  ( $\text{CHCl}_3$ ,  $c = 5.84$  mg/ml): - 2.19°.

**S7:**  $^1\text{H}$  NMR: (299.7 MHz,  $\text{CDCl}_3$ )  $\delta$  6.07 (NH, d,  $J = 4.4$  Hz, 1H), 4.56 (CH-lac, ddd,  $J = 5.7, 8.5, 11.5$  Hz, 1H), 4.47 (CH-lac, td,  $J = 1.1, 9.2$  Hz, 1H), 4.28 (CH-lac, ddd,  $J = 5.9, 9.4, 11.3$  Hz, 1H), 2.86 (CH-lac, dddd,  $J = 1.1, 5.9, 8.6, 12.5$  Hz, 1H), 2.23 ( $\text{CH}_2$ , t,  $J = 7.4$  Hz, 2H), 2.13 (CH-lac, dtd,  $J = 8.8, 11.4, 12.2$  Hz, 1H), 1.66 ( $\text{CH}_2$ , m, 8H), 1.20 ( $\text{CH}_2$  and CH, m, 5H), 0.87 ( $\text{CH}_2$ , m, 2H);  $^{13}\text{C}$  NMR: (75.4 MHz,  $\text{CDCl}_3$ )  $\delta$  175.80, 173.94, 66.23, 49.34, 37.62, 37.16, 36.54, 33.66, 30.79, 26.84, 26.54, 22.97; IR ( $\text{cm}^{-1}$ ): 3306, 2923, 2851, 1777, 1643, 1551, 1379, 1175, 1009, 945, 680;  $[\alpha]_{\text{D}}^{25}$  ( $\text{CHCl}_3$ ,  $c = 8.56$  mg/ml): + 4.46°.

### **Primary reporter gene assay data for Libraries Q, R, and S.**

The three bacterial reporter strains used in this study were: *E. coli* DH5 $\alpha$  harboring the QscR expression vector pJN105Q and a plasmid-born PA1897-*lacZ* expression vector (pJL101),<sup>6</sup> *E. coli* DH5 $\alpha$  harboring the LasR expression vector pJN105L and a plasmid-born *PlasI-lacZ* fusion (pSC11),<sup>6</sup> *V. fischeri* ES114 ( $\Delta$ -*luxI*),<sup>7</sup> and *A. tumefaciens* WCF47 ( $\Delta$ -*traI*) harboring a plasmid-born *PtraI-lacZ* fusion (pCF372).<sup>8</sup> The antagonism and agonism assay protocols were identical to those reported previously; see text for additional details. The primary reporter gene assay data for the control compounds and synthetic AHLs **Q1–Q13**, **R1–R9** and **S1–S7** are listed below in Table S-2. These data are also plotted graphically in Figures S1–S4. Quantitative agonism and antagonism dose response graphs are presented in Figures S5–S12.

**Table S-2.** Primary antagonism and agonism assay data for Libraries Q, R, and S.<sup>a</sup>

| Compd        | <i>E. coli</i> –QscR <sup>b</sup> |                             | <i>E. coli</i> – LasR <sup>c</sup> |                             | <i>V. fischeri</i> – LuxR <sup>d</sup> |                             | <i>A. tumefaciens</i> – TraR <sup>e</sup> |                             |
|--------------|-----------------------------------|-----------------------------|------------------------------------|-----------------------------|----------------------------------------|-----------------------------|-------------------------------------------|-----------------------------|
|              | Inhibition [%] <sup>c</sup>       | Activation [%] <sup>d</sup> | Inhibition [%] <sup>f</sup>        | Activation [%] <sup>g</sup> | Inhibition [%] <sup>i</sup>            | Activation [%] <sup>g</sup> | Inhibition [%] <sup>k</sup>               | Activation [%] <sup>g</sup> |
| <b>OdDHL</b> | -53                               | 99                          | --                                 | 100                         | 86                                     | 3                           | 48                                        | 13                          |
| <b>DDHL</b>  | -32                               | 84                          | -10                                | 80                          | 39                                     | 7                           | 54                                        | 0                           |
| <b>OOHL</b>  | -54                               | 99                          | 74                                 | 8                           | 53                                     | 15                          | --                                        | 100                         |
| <b>1</b>     | 111                               | 0                           | 7                                  | 0                           | 81                                     | 1                           | 61                                        | 0                           |
| <b>2</b>     | 96                                | 0                           | 46                                 | 0                           | 17                                     | 16                          | 8                                         | 0                           |
| <b>3</b>     | 96                                | 0                           | 1                                  | 0                           | 25                                     | 0                           | 3                                         | 0                           |
| <b>4</b>     | 93                                | 0                           | 5                                  | 0                           | -51                                    | 0                           | -14                                       | 0                           |
| <b>5</b>     | 14                                | 57                          | -67                                | 94                          | 64                                     | 2                           | 31                                        | 16                          |
| <b>6</b>     | -95                               | 104                         | 55                                 | 31                          | 83                                     | 26                          | 94                                        | 0                           |
| <b>Q1</b>    | 18                                | 0                           | 5                                  | 0                           | 27                                     | 0                           | 8                                         | 0                           |
| <b>Q2</b>    | 64                                | 0                           | 23                                 | 0                           | 8                                      | 0                           | -13                                       | 0                           |
| <b>Q3</b>    | 40                                | 0                           | 9                                  | 0                           | 16                                     | 0                           | -24                                       | 0                           |
| <b>Q4</b>    | 83                                | 0                           | 20                                 | 0                           | 12                                     | 0                           | -17                                       | 0                           |
| <b>Q5</b>    | 98                                | 0                           | -10                                | 1                           | 22                                     | 0                           | -9                                        | 0                           |
| <b>Q6</b>    | 62                                | 0                           | 11                                 | 0                           | -1                                     | 0                           | 0                                         | 0                           |
| <b>Q7</b>    | 52                                | 0                           | 4                                  | 0                           | -1                                     | 0                           | 1                                         | 0                           |
| <b>Q8</b>    | 51                                | 0                           | 0                                  | 0                           | 14                                     | 0                           | -12                                       | 0                           |
| <b>Q9</b>    | 94                                | 0                           | -8                                 | 0                           | 48                                     | 0                           | -25                                       | 0                           |
| <b>Q10</b>   | 25                                | 30                          | -8                                 | 0                           | 85                                     | 0                           | -10                                       | 0                           |
| <b>Q11</b>   | 42                                | 0                           | -12                                | 1                           | 11                                     | 0                           | 0                                         | 0                           |
| <b>Q12</b>   | 79                                | 0                           | 20                                 | 1                           | 84                                     | 0                           | 0                                         | 0                           |
| <b>Q13</b>   | 72                                | 0                           | 36                                 | 0                           | 43                                     | 0                           | 0                                         | 0                           |
| <b>R1</b>    | 69                                | 1                           | 7                                  | 37                          | 16                                     | 0                           | -24                                       | 0                           |
| <b>R2</b>    | 64                                | 9                           | 6                                  | 1                           | 24                                     | 0                           | 0                                         | 0                           |
| <b>R3</b>    | 30                                | 4                           | 5                                  | 0                           | 33                                     | 0                           | 10                                        | 0                           |
| <b>R4</b>    | -42                               | 46                          | 7                                  | 0                           | 32                                     | 0                           | -17                                       | 0                           |
| <b>R5</b>    | -58                               | 38                          | 14                                 | 0                           | 34                                     | 0                           | -9                                        | 0                           |
| <b>R6</b>    | 83                                | 7                           | 47                                 | 2                           | 69                                     | 0                           | 0                                         | 0                           |
| <b>R7</b>    | 62                                | 0                           | 2                                  | 0                           | 22                                     | 0                           | 1                                         | 0                           |
| <b>R8</b>    | 26                                | 2                           | -8                                 | 0                           | 6                                      | 0                           | 0                                         | 0                           |
| <b>R9</b>    | -19                               | 2                           | 22                                 | 0                           | 24                                     | 0                           | -10                                       | 0                           |
| <b>S1</b>    | 66                                | 7                           | 33                                 | 0                           | 39                                     | 0                           | 47                                        | 0                           |
| <b>S2</b>    | -51                               | 103                         | 16                                 | 0                           | 41                                     | 0                           | 24                                        | 0                           |
| <b>S3</b>    | -39                               | 80                          | 32                                 | 21                          | 30                                     | 0                           | 11                                        | 0                           |
| <b>S4</b>    | 48                                | 1                           | 5                                  | 0                           | 9                                      | 0                           | -13                                       | 0                           |
| <b>S5</b>    | 41                                | 5                           | 6                                  | 0                           | 1                                      | 0                           | 4                                         | 0                           |
| <b>S6</b>    | 59                                | 2                           | 0                                  | 0                           | 85                                     | 0                           | 0                                         | 0                           |
| <b>S7</b>    | 72                                | 23                          | 56                                 | 0                           | 93                                     | 0                           | 76                                        | 8                           |

<sup>a</sup> All assays performed in triplicate; Error did not exceed  $\pm 10\%$ . Shaded compounds are controls.  $\beta$ -galactosidase production or luminescence in the absence of added compound was less than 0.1%; Negative controls containing no compound were subtracted from each sample to account for background. Negative inhibition values indicate that the compound activates at the tested concentration. <sup>b</sup> Strain: *E. coli* (pJN105Q pJL101). Assay data normalized to DDHL. <sup>c</sup> Screen performed using 5  $\mu$ M synthetic ligand against 20 nM DDHL. <sup>d</sup> Screen performed using 5  $\mu$ M ligand. <sup>e</sup> Strain: *E. coli* DH5 $\alpha$  (pJN105L pSC11). Assay data normalized to OdDHL. <sup>f</sup> Screen performed using 10  $\mu$ M synthetic ligand against 10 nM OdDHL. <sup>g</sup> Screen performed using 10  $\mu$ M ligand. <sup>h</sup> Strain: *V. fischeri* ES114 ( $\Delta$ -luxI). Assay data normalized to OHHL. <sup>i</sup> Screen performed using 10  $\mu$ M synthetic ligand against 3  $\mu$ M OHHL. <sup>j</sup> Strain: *A. tumefaciens* WCF47 (pCF372). Assay data normalized to OOHL. <sup>k</sup> Screen performed using 10  $\mu$ M synthetic ligand against 100 nM OOHL.

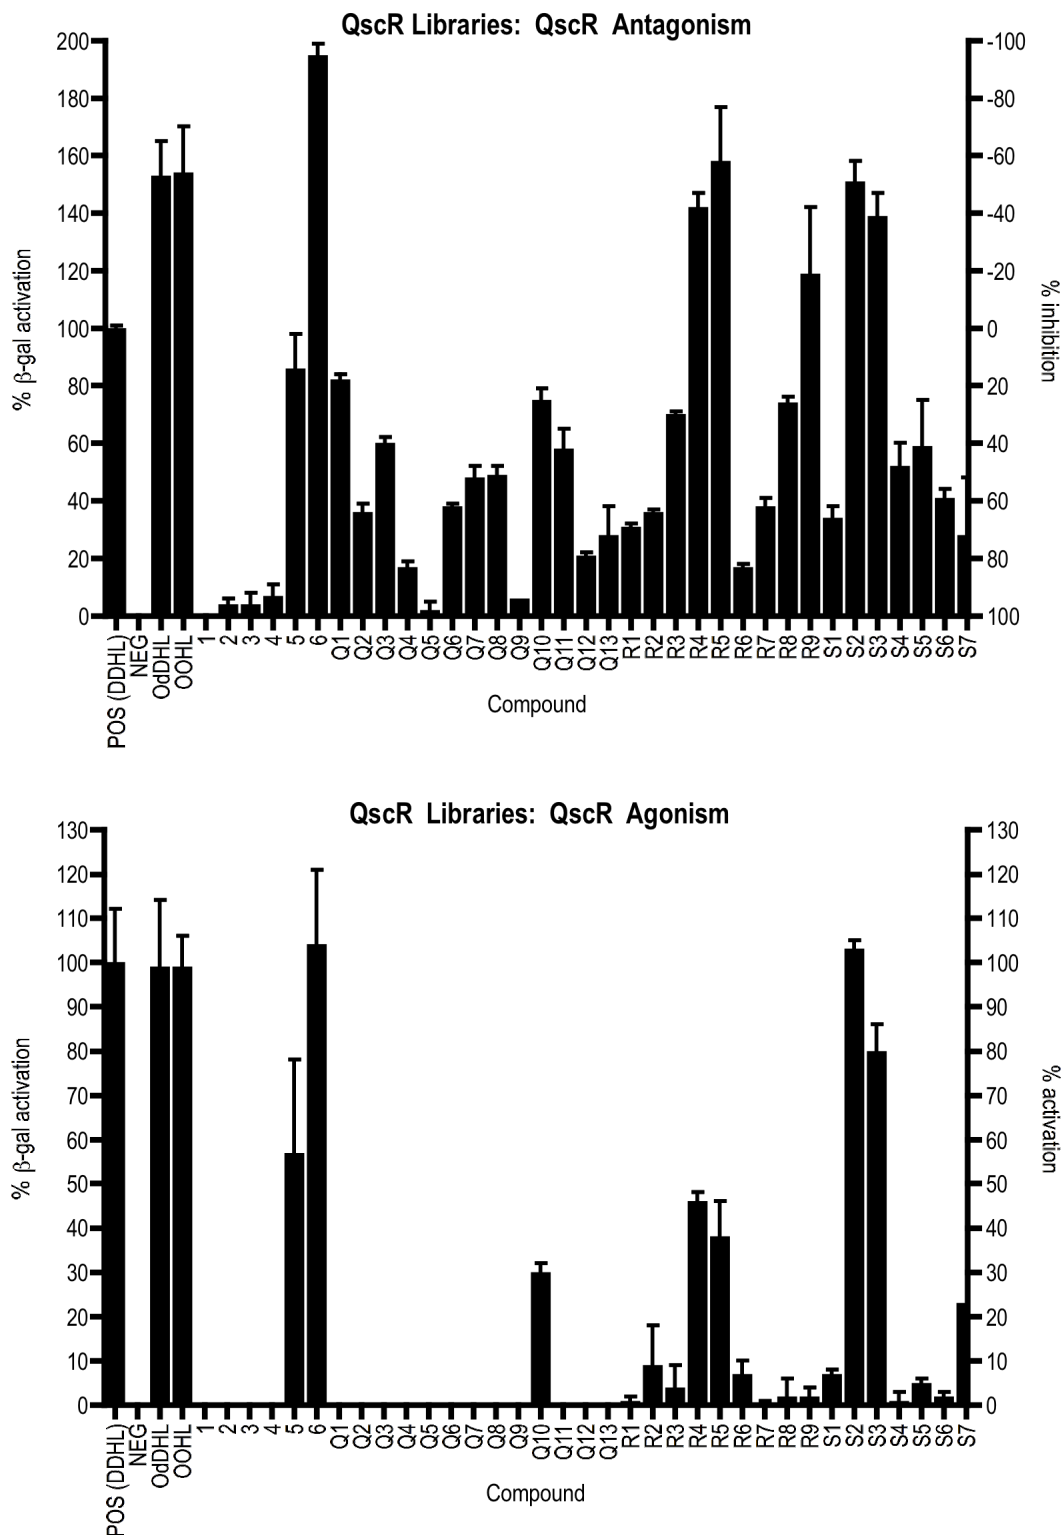

**Figure S-1.** Primary screening data for libraries Q, R, and S screened in *E. coli* (QscR reporter). *Top:* Antagonism screen performed using 5  $\mu$ M of synthetic ligand against 20 nM of DDHL. Positive control (POS) = 20 nM of DDHL. %  $\beta$ -gal activation = %  $\beta$ -galactosidase activation vs. positive control. *Bottom:* Agonism screen performed using 5  $\mu$ M of synthetic ligand. Positive control (pos) = 5  $\mu$ M of DDHL.

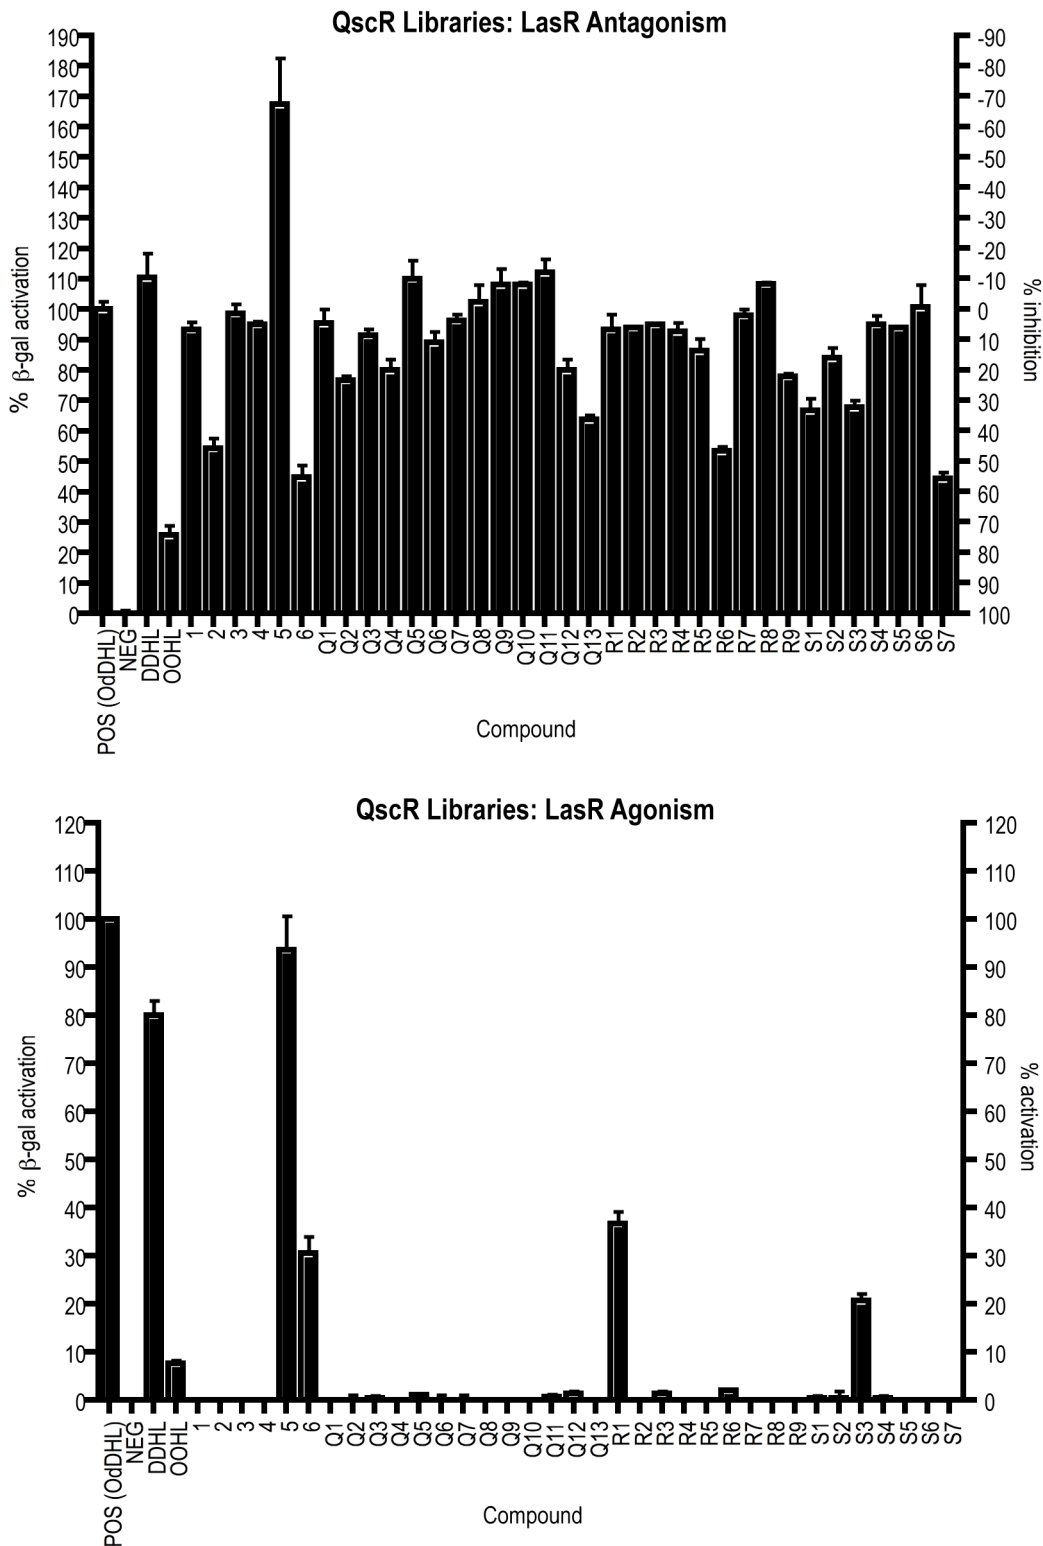

**Figure S-2.** Primary screening data for libraries Q, R, and S screened in *E. coli* (LasR reporter). *Top:* Antagonism screen performed using 10  $\mu$ M of synthetic ligand against 10 nM of OdDHL. Positive control (POS) = 10 nM of OdDHL. *Bottom:* Agonism screen performed using 10  $\mu$ M of synthetic ligand. Positive control (pos) = 10  $\mu$ M of OdDHL.

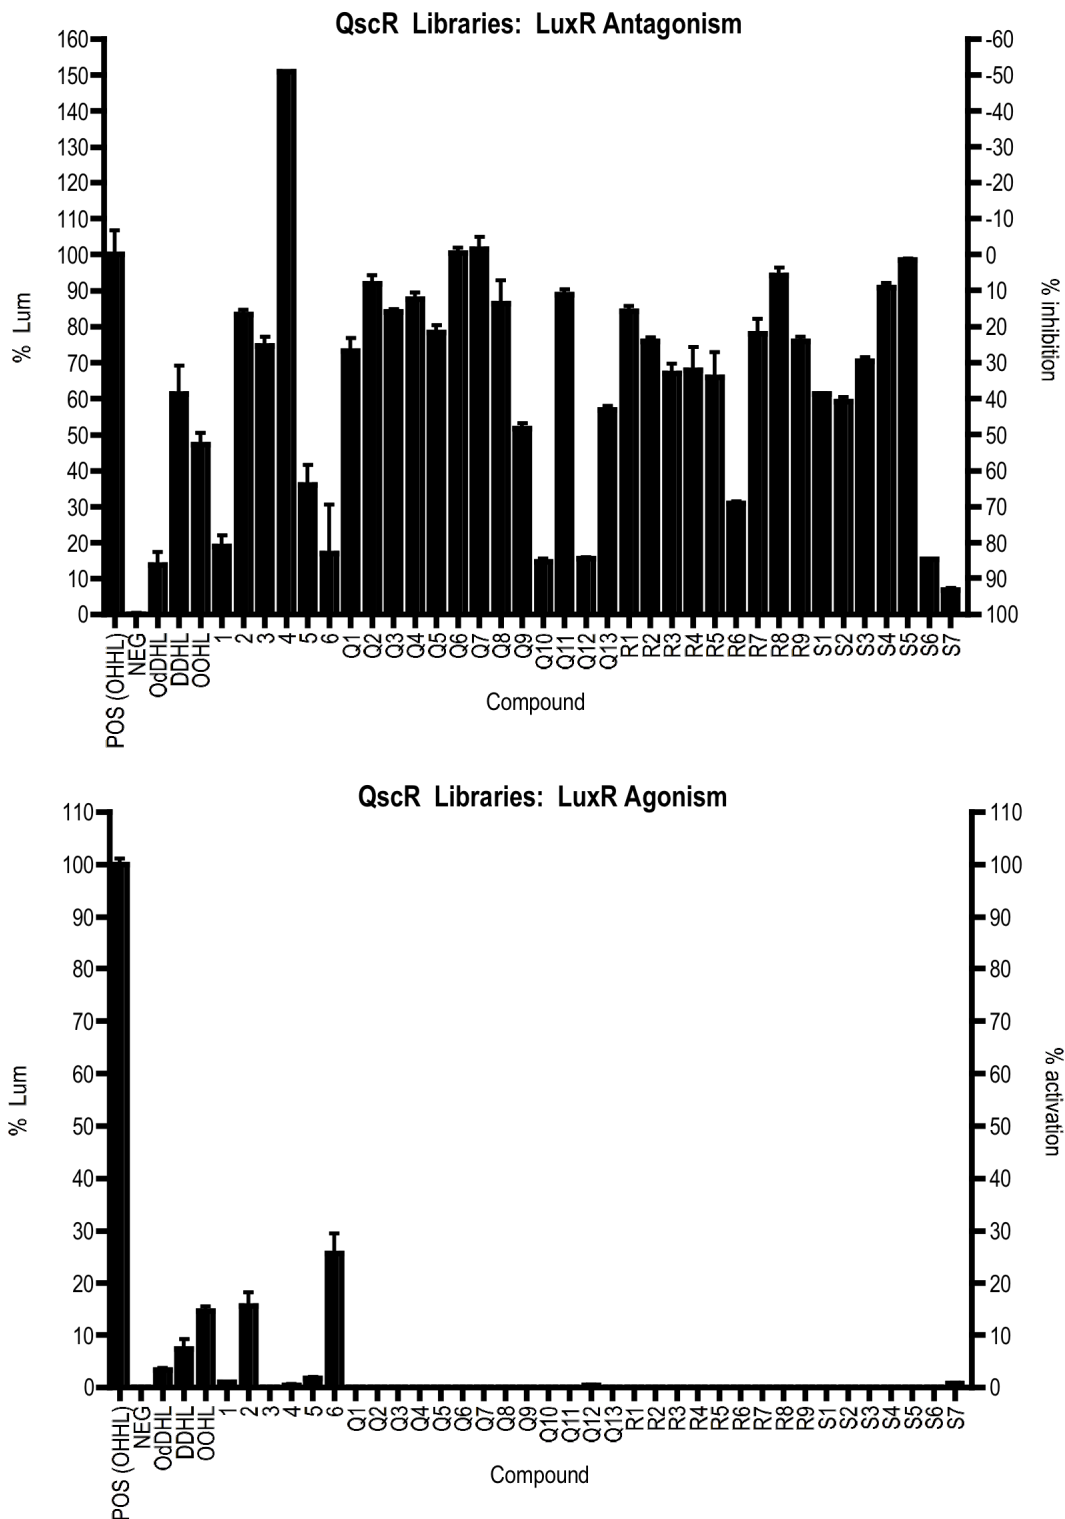

**Figure S-3.** Primary assay data for libraries Q, R, and S screened in *V. fischeri* (LuxR). *Top:* Antagonism screen performed using 10  $\mu$ M of synthetic ligand against 3  $\mu$ M of OHHL. Positive control (POS) = 3  $\mu$ M OHHL. % Lum = percent luminescence vs. positive control. *Bottom:* Agonism screen performed using 10  $\mu$ M of synthetic ligand. Positive control (pos) = 10  $\mu$ M of OHHL.



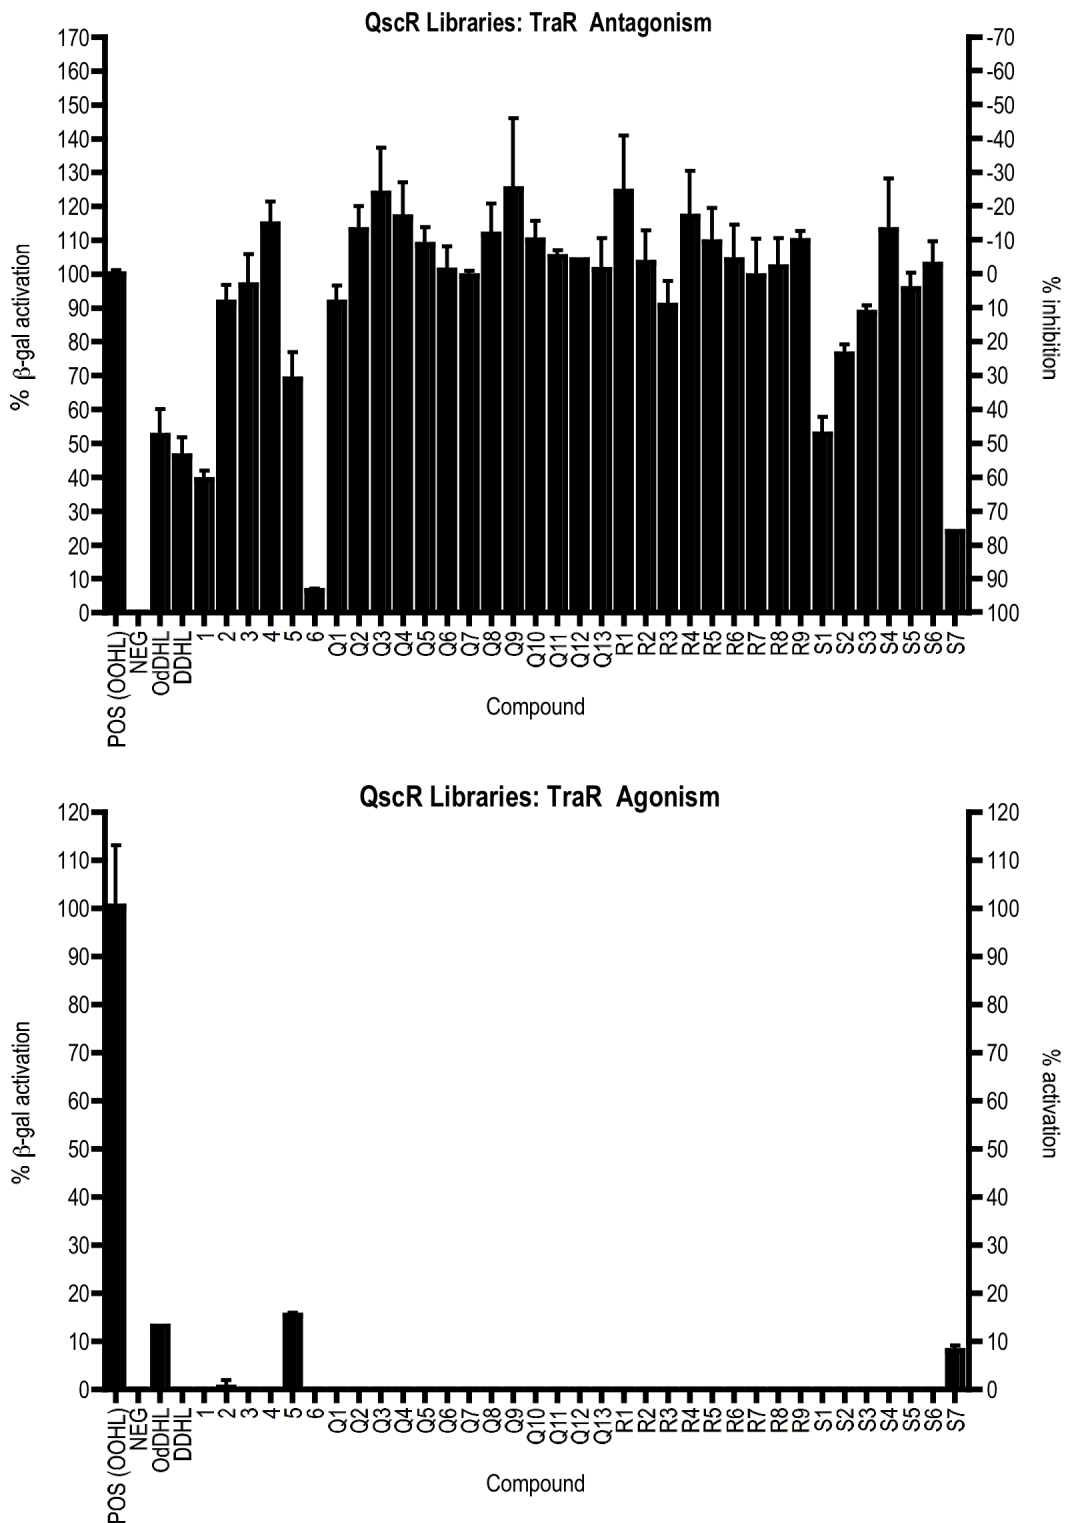

**Figure S-4.** Primary screening data for libraries Q, R, and S in *A. tumefaciens* (TraR). *Top:* Antagonism screen performed using 10  $\mu$ M of synthetic ligand against 100 nM of OOHL. Positive control (POS) = 100 nM of OOHL. Miller units report relative absorbance. *Bottom:* Agonism screen performed using 10  $\mu$ M of synthetic ligand. Positive control (pos) = 10  $\mu$ M of OOHL.

**Dose response agonism and antagonism data in *E. coli* (QscR reporter).**

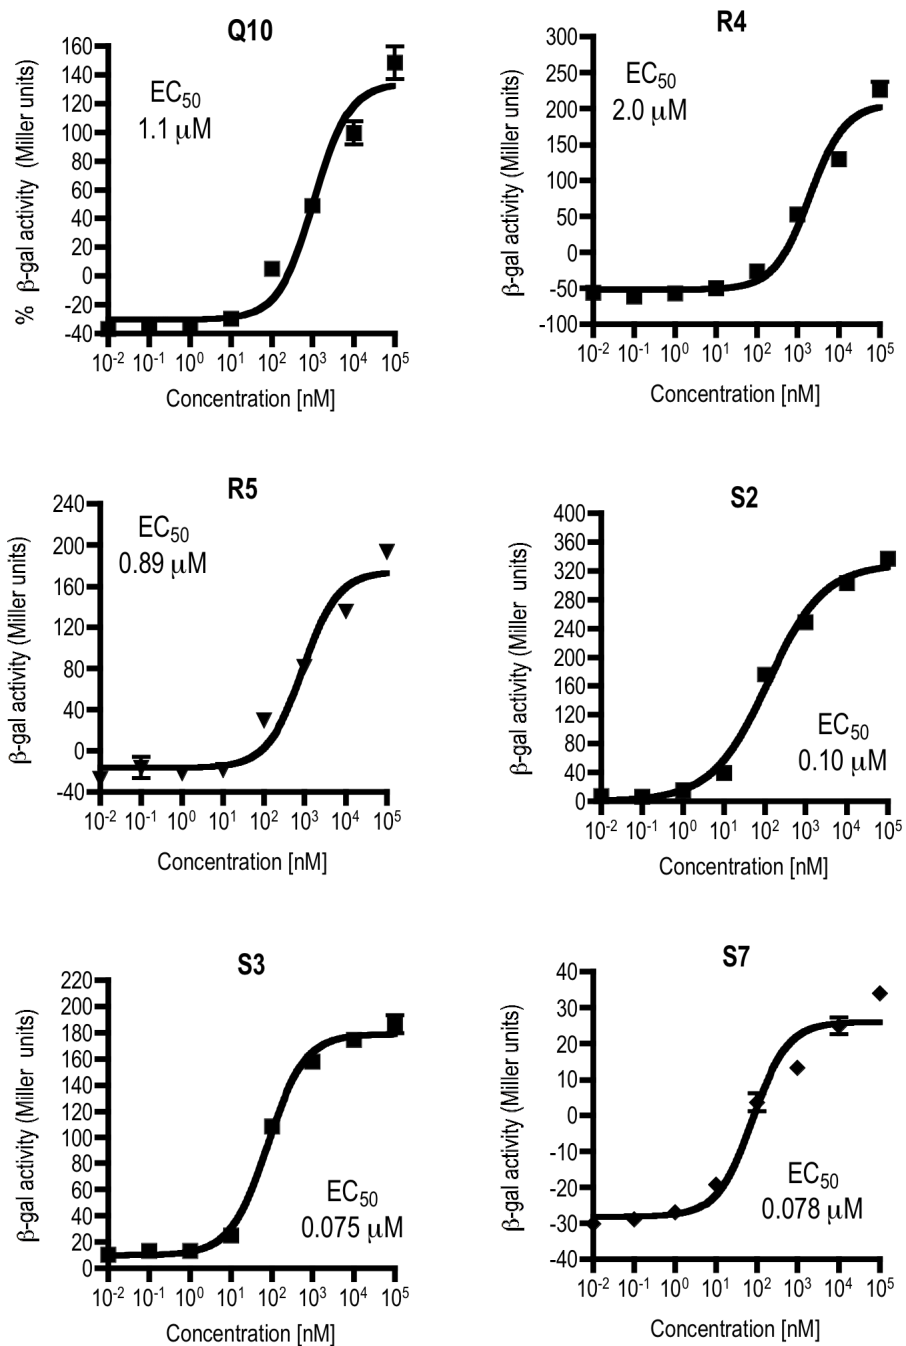

**Figure S-5.** Agonism dose responses and EC<sub>50</sub> values for AHLs Q10, R4, R5, S2, S3, and S7 in *E. coli* (QscR reporter). Synthetic ligand screened against 20 nM of DDHL over varying concentrations. IC<sub>50</sub> values calculated using GraphPad Prism. Error bars, s.d. of the means of triplicate samples.

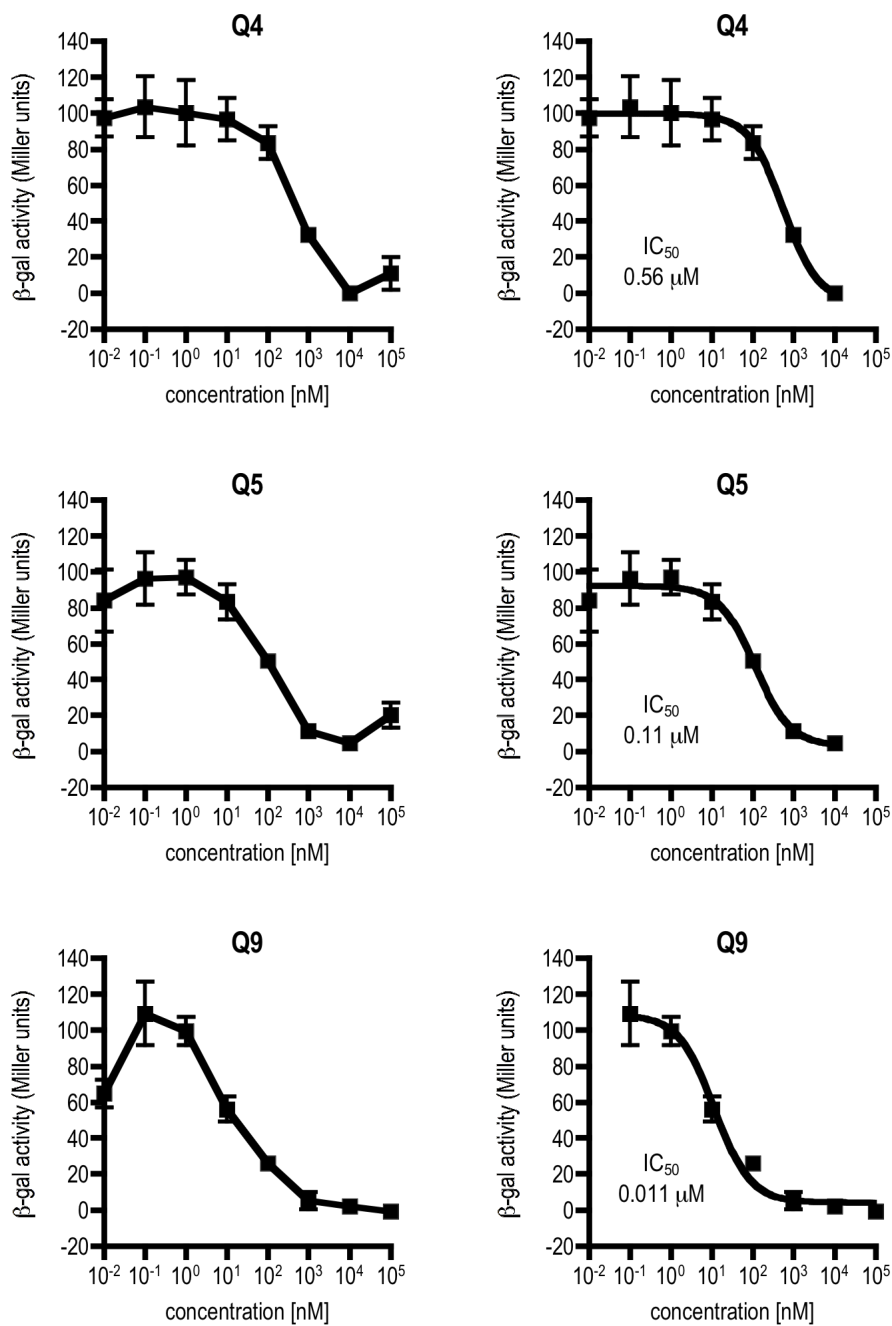

**Figure S-6.** Antagonism dose responses and  $IC_{50}$  values for AHLs **Q4**, **Q5**, and **Q9** in *E. coli* (QscR reporter). *Left:* Full dose response curve. *Right:* Section of dose response curve from which  $IC_{50}$  value was calculated. Synthetic ligand screened against 20 nM of DDHL over varying concentrations.  $IC_{50}$  values calculated using GraphPad Prism. Error bars, s.d. of the means of triplicate samples.

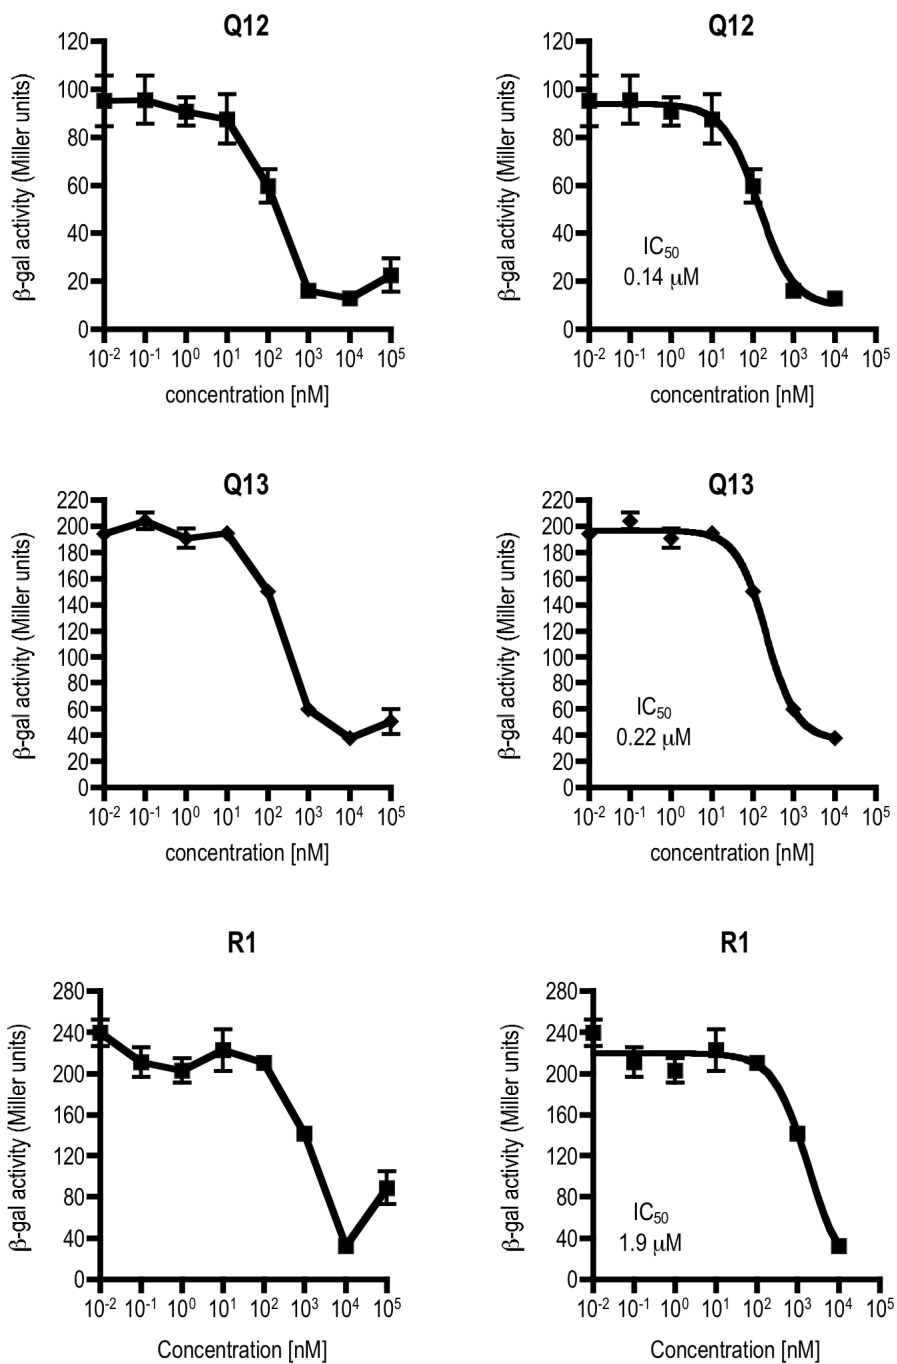

**Figure S-7.** Antagonism dose responses and  $IC_{50}$  values for AHLs **Q12**, **Q13**, and **R1** in *E. coli* (QscR reporter). *Left:* Full dose response curve. *Right:* Section of dose response curve from which  $IC_{50}$  value was calculated. Synthetic ligand screened against 20 nM of DDHL over varying concentrations.  $IC_{50}$  values calculated using GraphPad Prism. Error bars, s.d. of the means of triplicate samples.

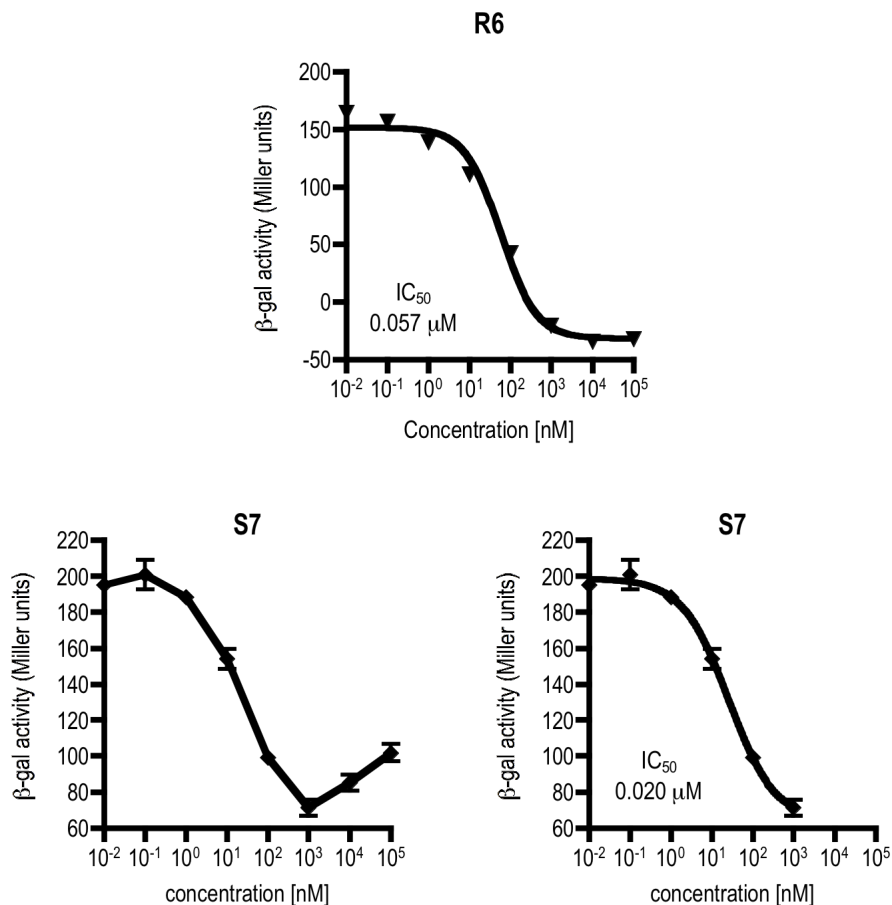

**Figure S-8.** Antagonism dose responses and  $IC_{50}$  values for AHLs **R6** and **S7** in *E. coli* (QscR reporter). For **S7**, *Left*: Full dose response curve. *Right*: Section of dose response curve from which  $IC_{50}$  value was calculated. Synthetic ligand screened against 20 nM of DDHL over varying concentrations.  $IC_{50}$  values calculated using GraphPad Prism. Error bars, s.d. of the means of triplicate samples.

**Dose response agonism and antagonism data in *E. coli* (LasR reporter).**

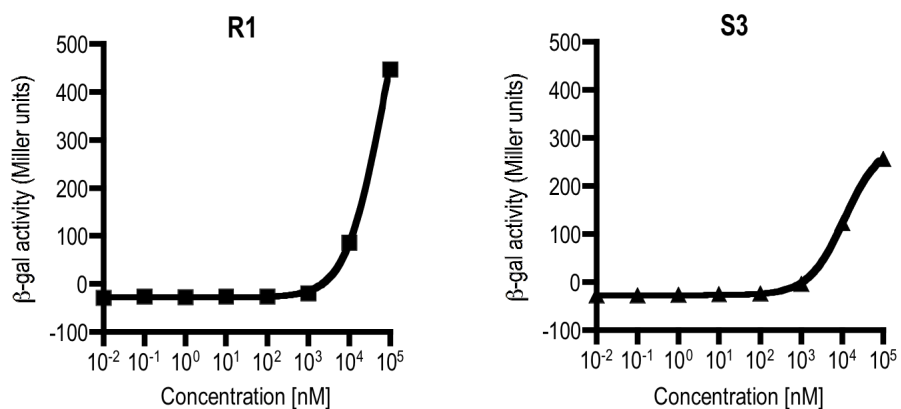

**Figure S-9.** Agonism dose responses for AHLs **R1** and **S3** in *E. coli* (LasR reporter). Error bars, s.d. of the means of triplicate samples.  $EC_{50}$  values not calculated.

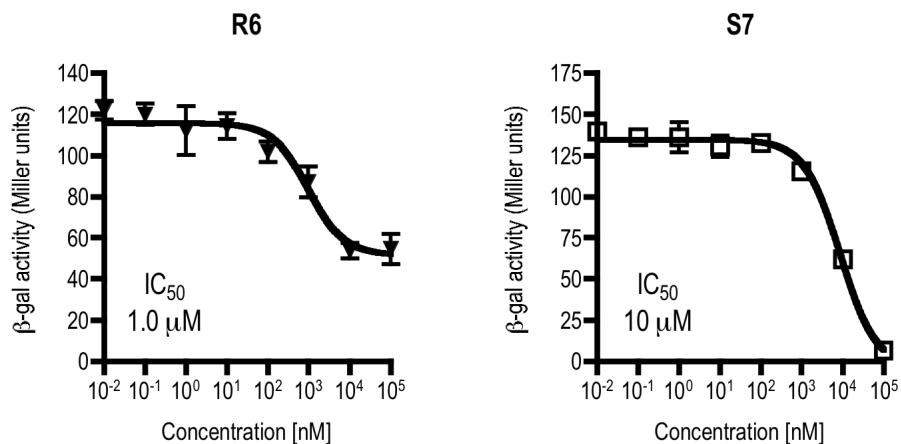

**Figure S-10.** Antagonism dose responses and  $IC_{50}$  values for AHLs **R6** and **S7** in *E. coli* (LasR reporter). Synthetic ligand screened against 20 nM of OdDHL over varying concentrations.  $IC_{50}$  values calculated using GraphPad Prism. Error bars, s.d. of the means of triplicate samples.

**Dose response antagonism data in *V. fischeri* (LuxR reporter).**

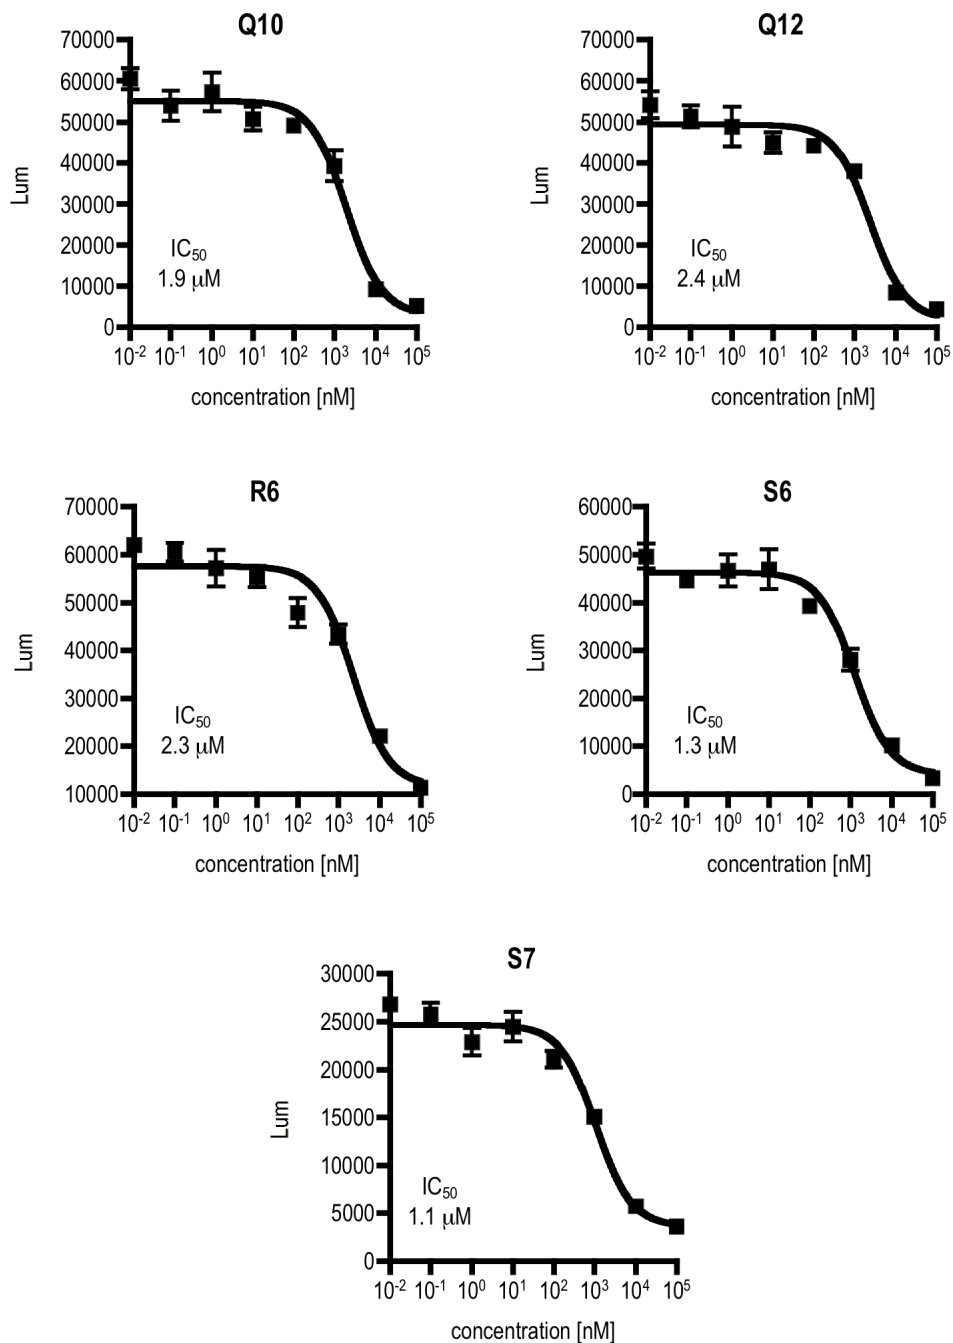

**Figure S-11.** Antagonism dose response and  $IC_{50}$  value for AHLs **Q10**, **Q12**, **R6**, **S6**, and **S7** in *V. fischeri*. Synthetic ligand screened against 3  $\mu M$  of OHHL over varying concentrations. RLU = relative light units.  $IC_{50}$  value calculated using GraphPad Prism. Error bars, s.d. of the means of triplicate samples.

**Dose response antagonism and agonism data in *A. tumefaciens* (TraR reporter).**

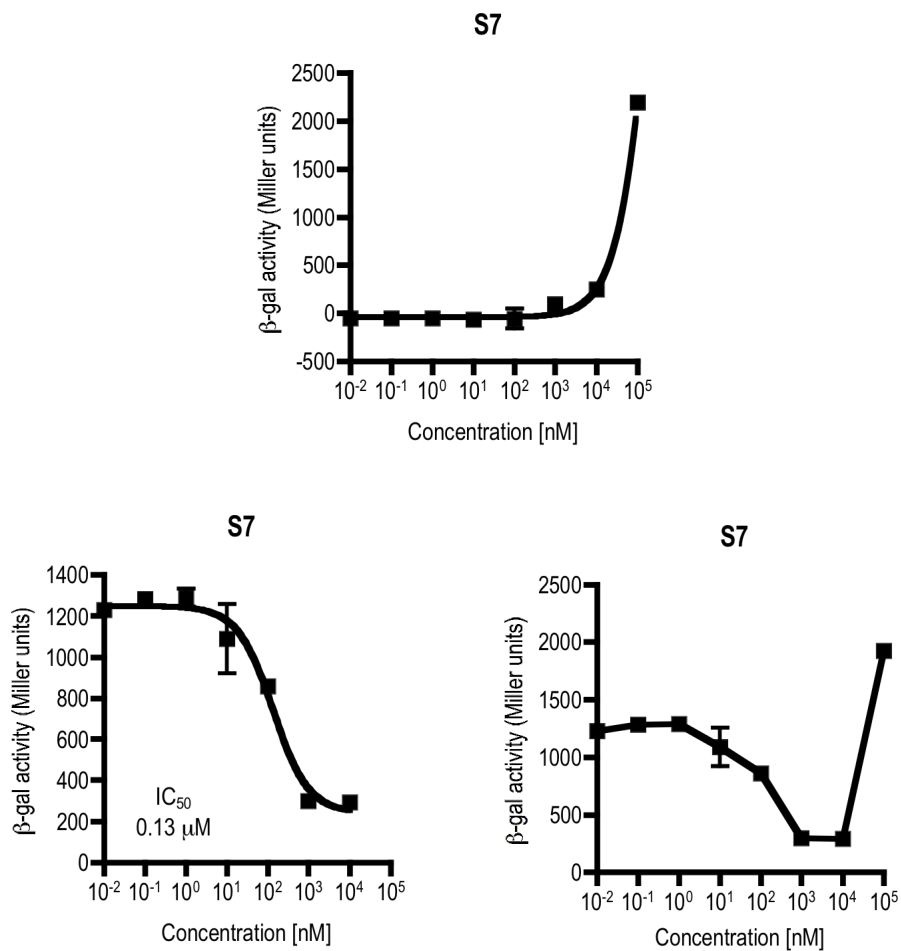

**Figure S-12.** Agonism (top), Antagonism (bottom) dose response and  $IC_{50}$  value for AHL S7 in *A. tumefaciens*. *Bottom Left:* Full dose response curve. *Right:* Section of dose response curve from which  $IC_{50}$  value was calculated. Synthetic ligand screened against 100 nM of OOHL over varying concentrations.  $IC_{50}$  values calculated using GraphPad Prism. Error bars, s.d. of the means of triplicate samples.



**References and notes.**

- (1) For further information about this Milestone  $\mu$ W reactor, see:  
<http://milestonesci.com/index.php/product-menu/synth/microsynth.html>
- (2) For further information about this CEM  $\mu$ W reactor, see: <http://www.cemsynthesis.com/>
- (3) Geske, G. D.; O'Neill, J. C.; Miller, D. M.; Mattmann, M. E.; Blackwell, H. E. *J. Am. Chem. Soc.* **2007**, *129*, 13613-25.
- (4) Geske, G. D.; O'Neill, J. C.; Miller, D. M.; Wezeman, R. J.; Mattmann, M. E.; Lin, Q.; Blackwell, H. E. *ChemBioChem* **2008**, *9*, 389-400.
- (5) Mattmann, M. E.; Geske, G. D.; Worzalla, G. A.; Chandler, J. R.; Sappington, K. J.; Greenberg, E. P.; Blackwell, H. E. *Bioorg. Med. Chem. Lett.* **2008**, *18*, 3072-5.
- (6) Lee, J.-H.; Lequette, Y.; Greenberg, E. P. *Mol. Microbiol.* **2006**, *59*, 602-9.
- (7) Lupp, C.; Urbanowski, M.; Greenberg, E. P.; Ruby, E. G. *Mol. Microbiol.* **2003**, *50*, 319-331.
- (8) Zhu, J.; Beaber, J. W.; More, M. I.; Fuqua, C.; Eberhard, A.; Winans, S. C. *J. Bacteriol.* **1998**, *180*, 5398-5405.
